# Supplementary material for: Bioengineering horizon scan 2020
Source: eLife. 2020 May 29;9:e54489. doi: 10.7554/eLife.54489 (PMC7259952; doi:10.7554/eLife.54489)
Supplement: Supplementary file 1. — Raw and standardised scoring of the issues in the 2020 scan after the first and second rounds of the exercise, novelty scores of the issues in the 2020 scan, and standardised z-scores for the final 20 issues of the 2017 scan. [file elife-54489-supp1.xlsx]

## Sheet: Score 1 Raw
No.	ISSUE	SCORE 1	SCORE 2	SCORE 3	SCORE 4	SCORE 5	SCORE 6	SCORE 7	SCORE 8	SCORE 9	SCORE 10	SCORE 11	SCORE 12	SCORE 13	SCORE 14	SCORE 15	SCORE 16	SCORE 17	SCORE 18	SCORE 19	SCORE 20	SCORE 21	SCORE 22	SCORE 23	SCORE 24	SCORE 25	SCORE 26	SCORE 27	SCORE 28	SCORE 29	SCORE 30	SCORE 31	SCORE 32	SCORE 33	SCORE 34
1	Benefit Sharing and Infectious Disease	810	65	800	50	450	300	750	830	120	650	392	700	800	350	99	400	500	648	620	849	800	290	500	500	660	800	260	991	400	100	698	200	505	850
2	Bioengineering Challenging Benefit-Sharing under the Nagoya Protocol	650	54	930	250	390	600	750	800	180	400	416	725	790	345	450	472	800	647	600	850	590	285	700	450	670	700	699	983	600	120	152	300	420	530
3	Bioengineering and Low- and Middle-Income Countries (LMICs)	725	50	820	55	360	700	750	810	140	500	280	600	780	800	98	302	850	614	500	860	20	400	550	400	640	1000	650	857	500	50	236	400	550	520
4	Democratization of Genome Editing Tools	150	77	840	755	720	700	800	790	550	200	845	200	785	200	250	702	450	388	730	20	200	425	850	350	900	0	311	53	550	800	149	900	250	860
5	Broadening Access to Biotechnology	625	49	830	421	400	0	750	782	520	300	347	650	795	250	222	877	550	632	410	4	50	428	600	300	630	800	430	17	430	60	391	400	420	460
6	Genetic Essentialism, False Narratives and Rising Nationalism	901	125	980	752	250	700	800	950	750	420	42	300	490	240	100	222	860	714	680	5	40	434	750	250	504	600	390	666	630	55	841	300	850	200
7	Responsible Stewardship and the Nagoya Protocol	560	52	720	55	340	500	500	780	400	150	555	100	600	340	500	473	1000	666	380	845	600	418	503	200	665	1000	695	977	430	90	271	300	540	530
8	A Commons Approach Adopted to Certain Genetic Resources in International Governance	670	700	600	60	280	500	750	825	690	50	812	699	605	300	93	880	830	720	760	851	595	850	505	150	608	800	690	971	700	700	652	500	830	540
9	Widening Global Inequality	410	53	13	22	455	400	700	903	10	700	5	625	703	790	50	288	100	594	310	26	10	438	770	100	690	200	555	967	380	40	610	700	220	520
10	Advances in AI and Computational Techniques Applied to Protein Folding	495	41	200	503	945	200	800	600	730	40	542	400	852	900	251	890	430	800	650	378	310	470	450	1000	460	0	745	547	610	45	85	400	750	510
11	Dual-Use Concerns from Applying Machine Learning to Biotechnology	310	74	250	605	935	200	900	650	700	350	742	450	903	190	400	910	200	700	690	80	320	415	710	800	696	600	790	541	750	703	5	600	600	1000
12	Using AI for Data Standardization, Integration, and Valuation in Biotechnology	790	48	100	84	500	200	400	630	840	250	467	725	690	782	275	776	870	701	800	70	330	482	455	700	712	0	625	523	780	99	807	500	280	980
13	Full Genome Synthesis and New Industrial Organisms	640	35	500	532	750	600	900	610	500	450	800	645	851	650	425	915	470	502	880	8	200	772	780	1000	685	1000	809	521	760	810	243	800	810	970
14	Industrial Sabotage in the Bio-Economy	685	73	710	374	280	600	400	845	170	120	752	175	300	770	18	751	100	501	640	13	210	790	555	800	700	800	310	103	710	51	229	200	510	750
15	Outsourcing in Biotechnology	805	76	860	820	900	500	750	611	200	220	898	735	610	730	25	911	370	703	890	79	30	490	680	700	605	800	600	997	725	53	476	400	737	930
16	Edible Vaccines for Intensive Agricultural Systems	690	40	380	156	350	700	300	590	570	180	333	695	900	775	600	540	750	801	700	960	800	698	790	600	722	800	730	337	795	850	844	800	905	700
17	Attacking the Central Nervous System	720	59	480	675	950	500	900	690	350	850	710	150	890	3	75	555	420	760	662	298	190	882	556	1000	724	900	205	509	800	46	306	200	690	990
18	Bioengineering and Environmental Bioweapons	390	86	680	35	650	600	900	890	670	950	900	665	895	150	160	812	410	769	663	600	250	883	603	900	718	900	710	557	505	42	159	600	695	960
19	Bioengineering and Exotic Biological Weapon Systems	290	85	630	43	760	0	800	795	640	960	874	670	920	850	165	854	415	750	664	335	260	895	810	700	728	1000	410	503	605	41	313	500	701	950
20	Defensive Developments in the Emerging Biotechnological-Environmental-Engineering Complex	730	83	290	589	550	0	900	902	280	900	555	655	879	765	375	842	416	630	743	603	690	872	706	600	688	900	630	877	400	40	417	400	603	960
21	Toxin Weapons: Falling Between the CWC and BTWC	630	87	637	87	890	600	800	502	300	750	34	575	750	1	16	659	413	590	665	377	310	500	517	500	726	0	120	499	538	33	625	300	788	940
22	Adding New Sensorial Capabilities into the Brain	795	98	610	267	410	700	800	750	540	220	888	50	950	777	344	356	750	500	710	601	527	484	723	1000	780	0	455	487	815	720	404	300	706	880
23	Biomimetic Strategies for Human-Machine Interfaces	615	93	295	387	790	0	800	760	610	550	891	250	945	773	201	553	740	570	715	235	535	306	730	900	770	0	297	491	900	730	384	300	789	880
24	Cognitive-Enhancing Drugs and the Microbiome	830	88	777	128	915	0	850	640	870	370	543	150	670	774	40	489	780	435	720	100	536	530	818	800	765	0	302	13	850	780	455	0	930	780
25	Outsourcing Risk Through Cyberbiosecurity	695	75	120	23	590	0	500	885	630	90	732	225	875	778	85	916	400	480	520	99	627	761	601	500	705	0	370	467	655	61	863	200	912	930
26	Partial Take-Up of Cyberbiosecurity Measures Will Leave Significant Areas of Vulnerability in the Bio-Economy	510	72	780	20	585	600	500	887	660	110	451	215	676	779	84	800	395	520	400	101	610	870	699	400	651	0	784	449	495	59	0	300	632	770
27	Carbon Pricing as a Driver of the Bioeconomy	820	1000	689	48	500	800	650	645	910	780	250	315	550	783	710	657	880	550	400	375	100	920	490	400	410	0	580	443	555	500	301	500	880	490
28	Carbon Sequestration Through Enhanced Photosynthesis, Including Through Synthetic Metabolic Engineering	895	62	211	634	490	800	700	747	430	990	843	585	777	785	695	773	760	770	740	870	890	884	788	500	730	800	807	331	615	130	301	300	897	400
29	Crops for the New Climate	835	61	457	125	640	400	500	805	590	550	777	425	880	781	38	799	900	400	690	980	895	792	769	900	720	1000	855	317	385	70	446	400	675	790
30	New Techniques to Develop Resource-Efficient, Environmentally Sustainable Animal Feed	855	82	345	570	620	800	500	705	680	460	44	450	580	10	10	787	510	805	695	2	880	752	712	25	732	800	700	313	405	101	419	400	921	790
31	Meeting the Growing Demand for Biomass and Feedstock	930	96	69	805	480	700	500	905	920	520	645	275	570	786	52	752	405	610	450	700	885	696	715	50	950	900	705	953	375	780	186	300	799	720
32	Phytoremediation of Contaminated Soils	700	60	80	403	820	600	500	715	760	410	447	475	815	772	444	809	890	860	683	970	729	846	725	800	800	1000	780	311	691	140	623	400	865	680
33	Establishment of the Biotechnological-Environmental Engineering Complex	450	84	90	67	830	0	0	910	450	630	31	175	640	720	177	489	5	495	200	12	700	494	677	100	300	800	301	947	101	130	0	200	706	960
34	Tackling Climate Change by Engineering Plant Roots	735	63	85	808	895	500	250	503	510	610	555	800	814	784	5	671	20	715	813	865	900	775	703	300	820	0	810	307	731	131	419	300	899	690
35	Engineered Alternatives to Ecosystem Services Competing with the Original and/or Creating Moral Hazard	655	95	870	127	810	0	300	797	40	810	701	575	787	776	415	909	885	595	712	120	255	430	714	200	840	0	250	809	211	152	789	200	864	760
36	Sustainability Claims Neither Validated nor Realized	780	97	847	171	860	0	0	940	70	710	87	585	444	630	417	611	875	795	210	25	905	426	503	600	980	0	750	941	301	451	817	100	909	740
37	Using Bioengineering for Enhanced Recycling and the Circular Economy	605	80	555	206	725	900	0	915	820	730	812	815	909	640	247	748	895	320	240	652	865	429	674	700	694	0	850	101	401	651	839	400	845	710
38	Live-Plant Dispensers of Chemical Signals	590	47	580	580	865	800	0	595	230	670	748	655	688	771	15	559	480	755	737	875	850	893	706	700	702	1000	510	293	851	92	629	300	800	250
39	Agricultural Gene Drives	250	34	870	524	835	400	1000	707	860	860	312	675	638	767	333	618	490	665	640	599	601	730	666	600	790	800	707	431	171	831	176	200	684	840
40	Mammalian Gene Drives	200	42	930	33	895	400	1000	895	830	460	444	645	641	510	329	622	50	609	636	6	602	685	667	500	785	800	385	433	461	861	119	100	716	830
41	Plant-Inspired Designer Molecules for Medicine, Agriculture and Industry	400	33	60	23	395	900	1000	900	90	230	400	685	877	255	529	798	995	616	570	995	866	487	455	400	760	800	286	11	441	35	209	200	831	480
42	T-DNA Transgene-Insertion Genetic and Epigenetic Impacts in Plants	900	31	10	589	753	400	750	742	110	490	231	580	654	555	567	399	905	626	435	1	301	309	678	300	652	300	270	937	241	788	844	400	901	500
43	Bioengineered Replacement Organs	755	43	267	636	475	700	500	695	810	30	843	825	955	620	604	717	660	516	530	200	501	699	608	600	930	1000	140	7	851	121	111	400	432	550
44	DIY Pharma	480	57	534	906	300	400	800	899	420	120	567	875	888	440	283	787	80	416	360	305	901	795	547	1000	920	800	400	421	571	44	260	600	555	890
45	The Rise of Cell Therapies and Personalised Medicine	490	51	521	253	275	600	700	500	890	210	648	610	966	820	482	721	910	376	715	374	605	337	680	400	890	1000	550	439	752	888	882	500	667	900
46	Direct-To-Consumer Genetic Testing (DTC-GT)	580	71	589	704	670	500	500	920	880	30	76	555	730	460	800	718	915	366	626	3	403	513	915	300	506	800	560	709	481	666	896	400	820	820
47	(Mammalian) Microbiome Engineering	890	46	888	209	780	300	650	495	580	110	721	690	723	680	37	725	980	406	720	376	800	796	777	700	200	400	450	463	632	833	424	400	708	260
48	Using DNA Origami for Enhanced Drug Delivery	680	89	438	306	910	400	800	699	490	205	911	695	716	647	237	497	903	536	687	598	445	912	659	100	596	700	520	97	792	164	820	300	765	450
49	Discovering New Antibiotics Through Novel Soil Screening	840	90	278	546	930	400	700	701	190	640	547	555	853	825	347	417	520	606	910	901	820	782	607	500	734	1000	845	283	762	154	160	500	802	800
50	Fighting Disease with Nanorobots	910	92	289	345	385	500	600	479	50	340	791	225	943	545	111	595	904	546	540	23	201	427	827	200	150	600	324	281	642	879	191	300	796	730
51	Virus Resurrection	460	56	321	10	990	300	900	798	900	470	840	335	732	180	612	845	495	737	675	123	813	326	768	900	695	0	180	701	442	201	643	300	700	920
52	Genetically Engineered Phage Therapy to Disrupt Human and Animal Infections	940	55	790	510	720	200	850	697	790	760	813	785	881	590	683	723	492	757	891	945	482	317	711	50	740	1000	785	599	433	832	1000	900	795	870
53	Multiple Coinfections and Immune Response	440	91	126	?	730	400	500	504	20	470	116	695	822	615	221	510	491	704	517	7	99	820	576	20	704		360	211	468	132	386	300	605	670
54	Function-Based Design in Protein Engineering	825	32	21	902	940	300	750	601	220	505	586	185	833	890	536	871	360	803	380	89	340	718	681	700	492	1000	420	457	503	701	77	400	850	290
55	Protection vs Efficient Exploitation of Genomic Information	610	68	825	845	735	400	200	698	850	330	663	705	871	885	681	878	912	682	0	9	0	301	911	600	598	1000	515	5	304	770	1000	300	613	470
56	The Regulation of Human Germline Engineering	715	400	976	538	365	400	1000	894	380	960	873	275	901	450	371	665	790	582	560	379	0	312	920	500	860	1000	255	199	533	210	918	300	685	910
57	Human Genomics Overlapping with Other Emerging Technologies	350	800	863	386	425	600	850	909	30	490	437	835	658	360	412	496	884	592	430	10	1	483	900	400	400	1000	445	863	833	220	964	300	500	440
58	Changing Norms in Bioengineering due to Multipolarity	1000	500	898	842	795	200	1000	300	560	305	112	795	794	950	494	396	985	461	190	18	555	420	672	700	686	0	405	929	703	143	370	300	950	430
59	Coordinating the International Governance of Biological Engineering and AI	220	900	783	320	200	600	750	501	330	975	801	820	725	13	191	806	795	591	180	19	110	489	740	600	714	0	623	607	773	878	143	200	766	660
60	Moving Towards Governance Mechanisms on Synthetic Biology	620	64	746	5	445	600	450	612	480	740	844	900	733	365	313	494	620	511	330	855	501	486	888	500	518	0	350	3	388	255	121	600	713	650
61	Additive Manufacturing	635	44	333	67	943	400	800	298	410	140	740	345	898	475	240	889	755	481	440	14	222	498	612	800	520	0	307	277	204	77	1	400	400	640
62	Bio-Based Production of Materials	750	45	367	387	555	900	750	881	720	310	766	785	821	480	127	892	899	531	645	333	255	886	839	900	620	800	530	853	604	44	86	400	810	420
63	Directed Evolution	550	30	32	46	435	400	400	496	530	530	600	485	801	50	46	671	260	679	140	15	0	477	655	1000	706	1000	160	89	584	21	13	500	600	430
64	DNA Storage and Novel Sensing and Biocomputing Methods	420	37	67	26	353	400	550	508	780	280	848	835	874	525	150	516	515	689	650	16	0	481	672	600	830	800	805	271	414	300	29	500	805	630
65	Multicellular Engineered Living Systems	430	39	478	765	343	600	500	649	620	170	341	505	954	580	184	475	425	699	614	17	657	488	891	700	708	600	290	269	384	160	290	500	680	410
66	Understanding and Engineering Microbial Consortia/Non-Axenic Microbial Systems	800	38	793	854	283	600	500	702	460	40	222	515	712	560	327	588	220	598	426	750	823	702	892	500	500	0	585	349	284	70	962	200	720	280
67	Weaponized Bio Narratives	905	100	698	638	533	400	200	792	710	910	456	175	648	815	776	813	983	683	605	444	202	479	777	500	710	0	740	601	454	310	913	300	903	620
68	The Regulation of Cognitive Enhancement	815	300	722	815	955	400	750	713	740	435	756	185	656	495	566	769	505	394	410	11	203	890	904	490	870	0	408	2	384	741	962	200	530	810
69	Enforcement of Standardization in Biological Engineering	705	99	45	368	625	300	0	785	80	65	366	655	866	780	359	885	502	617	320	21	898	765	721	480	650	1000	800	479	434	731	1000	400	630	610
70	Improved Regulation of Genetically Modified and Genetically Engineered Crops	300	81	753	154	523	700	750	714	250	135	441	50	855	430	727	664	986	542	230	888	899	832	785	470	522	1000	848	797	416	820	526	500	510	600
71	Governance and Oversight of Genome Editing	340	79	836	89	960	600	5	200	800	675	688	605	872	849	715	908	426	642	747	701	902	272	906	900	775	800	279	419	296	310	326	900	260	910
72	Regulating Biohacking/DIY Biology	950	78	823	357	513	300	750	319	150	525	712	100	899	2	468	816	403	631	609	24	799	212	903	1000	698	0	303	1	636	250	1000	709	390	590
73	Further Development and Formalisation of a Bioengineering Code of Ethics	260	200	57	456	965	400	500	100	130	375	167	675	912	357	368	717	402	621	325	202	508	182	654	460	716	1000	15	461	436	221	484	900	450	580
74	Increasing Need for the Effective Science Communication of Emerging Technologies Such as Gene Drives	845	36	4	136	655	400	700	202	370	890	34	350	811	323	797	655	501	611	290	30	717	183	678	450	649	1000	50	691	446	211	841	600	400	620
75	Challenged Regulatory Definitions	699	66	3	687	675	400	0	310	470	415	642	200	809	910	273	820	401	659	500	891	691	181	751	440	600	800	680	919	396	840	688	400	790	60
76	Regulating Data Storage, Protection and Use	850	70	2	739	665	400	200	888	770	485	775	555	808	476	810	761	911	719	638	22	316	250	907	430	550	800	620	911	417	166	754	800	700	570
77	Data Management Support for Biomedical Research	600	67	1	267	600	400	200	777	440	385	200	545	812	643	346	782	901	639	316	31	70	200	840	420	502	1000	200	773	437	168	719	700	708	570
78	Information Hazards	909	69	5	476	943	400	200	656	160	515	856	590	844	795	210	895	898	709	490	122	40	228	911	410	594	0	150	787	297	174	504	200	830	620
79	Ensuring the Responsible Governance of Engineering Biology Scale-Up	360	94	6	89	930	400	200	523	100	785	36	740	909	835	675	633	210	619	270	32	150	176	873	400	1000	700	210	907	546	900	216	200	790	560
80	What Future/s for Responsible Research and Innovation?	500	58	7	245	970	400	200	898	60	605	132	690	908	834	676	667	399	721	482	33	149	310	777	390	902	1000	300	887	646	660	127	700	660	80
81	Changing Economies of Bioscience	870	175	8	732	700	500	750	980	600	965	901	665	768	490	802	663	40	741	734	925	30	320	665	380	320	900	401	883	567	132	32	500	789	70
82	Demand-Driven Public Support for Critical Public Missions	470	600	15	623	610	400	750	970	210	225	204	620	722	833	737	557	422	702	550	34	630	406	504	370	970	0	245	881	437	125	970	700	879	100
83	Divergent Narratives and Reactive Responses	710	150	9	306	1000	300	0	966	650	245	11	545	700	500	648	584	421	668	467	225	666	604	779	360	180	500	190	859	337	135	913	500	600	50
	Average	640.952	126.084	455.386	378.61	645.928	445.783	585	703.157	481.928	463.072	532.723	524.325	780.133	575.41	347.301	682.253	593.916	618.12	550.506	341.072	461.06	549.048	708.867	533.675	673.398	580.488	486.277	523.145	532.145	345.518	475.349	415.771	691.217	639.277
	Standard Deviation	206.857	187.535	331.328	282.263	228.403	227.242	287.759	194.593	273.881	275.366	284.988	227.819	127.614	257.168	241.055	170.737	278.987	118.932	195.161	354.727	305.514	226.513	126.624	260.87	169.828	413.621	226.737	309.848	181.615	317.308	320.051	199.241	174.37	245.086

## Sheet: Score 1 Heard Of
No.	ISSUE	HEARD OF TOTAL	HEARD OF (%)	SCORE 1	SCORE 2	SCORE 3	SCORE 4	SCORE 6	SCORE 7	SCORE 8	SCORE 9	SCORE 10	SCORE 11	SCORE 12	SCORE 13	SCORE 14	SCORE 15	SCORE 16	SCORE 17	SCORE 18	SCORE 19	SCORE 20	SCORE 21	SCORE 21	SCORE 22	SCORE 23	SCORE 24	SCORE 25	SCORE 26	SCORE 27	SCORE 28	SCORE 29	SCORE 30	SCORE 31	SCORE 32	SCORE 33	SCORE 34
1	Benefit Sharing and Infectious Disease	29	0.852941	1	0	1	1	1	1	1	1	1	1	0	1	1	1	1	1	1	1	1	1	1	1	1	0	1	1	1	1	1	0	1	0	1	1
2	Bioengineering Challenging Benefit-Sharing under the Nagoya Protocol	25	0.735294	0	1	1	0	1	1	1	1	0	0	0	1	1	1	1	0	1	1	1	1	1	1	1	0	1	1	1	1	1	1	0	0	1	1
3	Bioengineering and Low- and Middle-Income Countries (LMICs)	26	0.764706	0	1	1	1	0	1	1	1	0	1	1	1	1	1	0	1	1	1	1	1	1	0	1	0	1	0	1	1	1	1	1	1	0	1
4	Democratization of Genome Editing Tools	30	0.882353	1	1	1	1	1	1	1	1	0	1	1	1	1	1	1	1	1	1	1	1	1	1	1	0	1	0	1	1	1	0	1	1	1	1
5	Broadening Access to Biotechnology	25	0.735294	0	1	1	1	0	0	1	1	1	1	0	1	0	1	0	1	1	0	1	1	1	1	1	0	1	1	1	1	1	1	1	0	1	1
6	Genetic Essentialism, False Narratives and Rising Nationalism	16	0.470588	0	0	1	0	0	1	1	1	0	1	0	0	1	1	0	1	1	1	1	0	1	0	0	0	1	1	0	1	0	0	1	0	0	0
7	Responsible Stewardship and the Nagoya Protocol	24	0.705882	0	1	1	1	0	1	1	1	0	0	1	1	1	1	1	0	1	0	1	0	1	1	1	0	1	1	1	1	1	1	0	0	1	1
8	A Commons Approach Adopted to Certain Genetic Resources in International Governance	16	0.470588	0	0	1	0	0	1	1	1	0	0	1	1	1	0	0	0	1	0	1	0	1	0	0	0	1	1	0	1	0	1	1	0	0	1
9	Widening Global Inequality	26	0.764706	1	1	1	1	0	1	1	1	0	1	0	1	1	1	0	1	1	1	1	1	1	1	0	0	1	1	1	1	0	0	1	1	1	1
10	Advances in AI and Computational Techniques Applied to Protein Folding	26	0.764706	1	1	1	1	1	0	1	1	1	1	1	0	1	1	1	1	1	1	1	1	1	0	1	1	1	0	1	1	0	0	1	0	0	1
11	Dual-Use Concerns from Applying Machine Learning to Biotechnology	28	0.823529	1	1	1	0	1	0	1	1	1	1	1	1	1	1	1	1	1	1	1	0	1	0	1	0	1	1	1	1	0	1	1	1	1	1
12	Using AI for Data Standardization, Integration, and Valuation in Biotechnology	21	0.617647	1	1	1	1	0	0	1	1	1	0	1	0	1	1	1	1	1	1	1	0	1	0	0	0	1	0	0	0	0	1	0	1	1	1
13	Full Genome Synthesis and New Industrial Organisms	28	0.823529	1	1	1	0	0	1	1	1	1	1	1	1	1	1	1	1	1	1	1	1	1	0	1	1	1	1	1	1	0	1	1	0	0	1
14	Industrial Sabotage in the Bio-Economy	25	0.735294	1	1	1	1	0	1	1	1	1	1	1	0	1	1	1	1	1	1	1	0	1	0	0	1	1	1	0	1	0	0	1	0	1	1
15	Outsourcing in Biotechnology	26	0.764706	1	1	1	1	1	1	1	1	1	0	0	1	1	1	1	1	1	1	1	0	1	0	0	0	1	1	1	1	0	1	0	1	1	1
16	Edible Vaccines for Intensive Agricultural Systems	17	0.5	0	1	1	1	0	1	1	1	0	0	1	0	1	0	0	0	1	0	0	1	1	0	0	0	1	1	1	0	0	1	0	1	0	1
17	Attacking the Central Nervous System	22	0.647059	1	1	0	1	1	1	1	1	0	0	1	0	1	1	0	1	1	1	1	0	1	0	1	1	1	1	0	0	0	0	1	0	1	1
18	Bioengineering and Environmental Bioweapons	27	0.794118	0	1	1	1	1	1	1	1	0	1	1	1	1	1	1	1	1	0	1	1	1	0	1	1	1	1	1	1	1	0	1	0	0	1
19	Bioengineering and Exotic Biological Weapon Systems	25	0.735294	1	1	1	0	1	1	1	1	0	1	1	1	1	1	0	1	1	1	1	0	1	0	1	1	1	1	0	1	0	0	1	1	0	1
20	Defensive Developments in the Emerging Biotechnological-Environmental-Engineering Complex	23	0.676471	0	1	1	1	1	1	1	1	0	1	1	1	1	0	0	0	1	0	1	1	1	0	0	1	1	1	0	1	1	0	1	0	1	1
21	Toxin Weapons: Falling Between the CWC and BTWC	19	0.558824	1	0	1	1	1	1	1	1	0	0	0	0	1	1	0	1	1	0	1	0	1	0	1	1	0	0	0	1	0	0	1	0	1	1
22	Adding New Sensorial Capabilities into the Brain	23	0.676471	0	0	1	1	1	1	1	1	1	0	0	0	1	0	1	1	1	1	1	1	1	0	1	1	1	0	1	1	0	0	1	1	0	1
23	Biomimetic Strategies for Human-Machine Interfaces	17	0.5	0	0	1	0	1	0	1	1	0	1	1	0	1	0	0	1	1	1	1	0	1	0	1	1	1	0	0	1	0	0	0	1	0	0
24	Cognitive-Enhancing Drugs and the Microbiome	21	0.617647	1	0	1	1	1	1	1	0	1	1	1	0	1	0	0	0	1	0	1	1	1	0	1	1	1	0	1	0	0	1	1	0	0	1
25	Outsourcing Risk Through Cyberbiosecurity	21	0.617647	1	1	0	1	1	0	1	1	1	1	1	0	1	1	0	1	1	1	1	1	1	0	0	1	1	0	0	0	0	0	1	0	0	1
26	Partial Take-Up of Cyberbiosecurity Measures Will Leave Significant Areas of Vulnerability in the Bio-Economy	21	0.617647	1	1	0	1	0	0	1	1	1	1	1	1	1	1	0	1	1	1	1	0	1	0	0	0	1	0	1	0	0	0	1	0	1	1
27	Carbon Pricing as a Driver of the Bioeconomy	20	0.588235	0	0	1	0	0	1	1	1	1	1	0	0	1	0	0	1	1	1	1	1	1	0	1	1	1	0	0	1	0	0	1	1	0	1
28	Carbon Sequestration Through Enhanced Photosynthesis, Including Through Synthetic Metabolic Engineering	17	0.5	0	1	1	0	0	1	1	1	1	1	1	0	0	0	1	0	1	0	1	1	1	0	0	1	1	1	1	0	0	0	0	0	0	0
29	Crops for the New Climate	29	0.852941	1	1	1	1	0	1	1	1	1	1	1	0	0	1	1	1	1	1	1	1	1	0	1	1	1	1	1	1	1	0	1	1	1	1
30	New Techniques to Develop Resource-Efficient, Environmentally Sustainable Animal Feed	20	0.588235	0	1	1	0	0	1	1	1	0	0	0	1	0	1	1	0	1	1	1	1	1	0	0	1	1	1	1	0	1	0	1	0	0	1
31	Meeting the Growing Demand for Biomass and Feedstock	25	0.735294	0	1	1	0	0	1	1	1	1	1	0	1	0	1	1	0	1	1	1	1	1	0	0	1	1	1	1	1	1	1	1	1	0	1
32	Phytoremediation of Contaminated Soils	20	0.588235	0	1	1	1	0	1	0	1	1	0	1	1	1	0	1	0	1	0	1	1	1	0	0	1	1	1	1	1	0	0	0	0	0	1
33	Establishment of the Biotechnological-Environmental Engineering Complex	19	0.558824	1	1	1	0	0	0	0	1	0	1	1	0	1	0	1	0	1	1	0	0	1	0	1	0	1	1	0	1	1	0	1	0	1	1
34	Tackling Climate Change by Engineering Plant Roots	14	0.411765	1	0	1	0	0	1	1	0	0	1	1	0	0	0	1	0	1	0	1	1	1	0	0	0	1	0	1	1	0	0	0	0	0	0
35	Engineered Alternatives to Ecosystem Services Competing with the Original and/or Creating Moral Hazard	21	0.617647	0	1	1	1	0	0	0	1	0	1	1	1	1	0	1	0	1	0	1	1	1	0	0	0	1	0	1	1	1	0	1	1	1	1
36	Sustainability Claims Neither Validated nor Realized	21	0.617647	1	1	1	1	0	0	1	1	0	1	1	1	0	0	1	0	1	1	1	0	1	0	1	1	1	0	1	1	0	0	0	1	0	1
37	Using Bioengineering for Enhanced Recycling and the Circular Economy	28	0.823529	1	1	1	1	0	1	0	1	1	1	1	1	1	1	1	0	1	1	1	1	1	0	1	1	1	0	1	1	1	1	1	1	0	1
38	Live-Plant Dispensers of Chemical Signals	14	0.411765	0	1	1	0	1	1	0	1	0	0	0	0	1	0	1	0	1	0	1	1	1	0	0	1	1	0	0	0	0	1	0	0	0	0
39	Agricultural Gene Drives	29	0.852941	0	1	1	1	1	1	1	0	1	1	1	1	1	1	1	0	1	1	1	1	1	0	1	1	1	1	1	1	0	1	1	1	1	1
40	Mammalian Gene Drives	30	0.882353	1	1	1	1	1	1	1	1	1	1	1	0	1	1	1	1	1	0	1	0	1	0	1	1	1	1	1	1	1	1	1	1	1	1
41	Plant-Inspired Designer Molecules for Medicine, Agriculture and Industry	24	0.705882	1	1	1	1	0	0	1	1	1	1	0	0	1	1	1	0	1	1	1	1	1	0	0	1	1	1	1	1	1	0	1	0	0	1
42	T-DNA Transgene-Insertion Genetic and Epigenetic Impacts in Plants	14	0.411765	0	1	0	0	0	1	0	1	0	0	0	0	0	0	1	1	1	1	1	1	1	0	0	1	1	1	0	0	1	0	0	0	0	0
43	Bioengineered Replacement Organs	27	0.794118	1	1	1	1	1	1	1	1	1	1	0	1	1	1	0	1	1	1	1	1	1	0	0	1	1	1	1	1	0	1	1	0	1	0
44	DIY Pharma	28	0.823529	1	1	1	1	0	0	1	1	1	1	1	1	1	1	1	0	1	1	1	1	1	0	1	1	1	0	1	1	1	0	1	1	1	1
45	The Rise of Cell Therapies and Personalised Medicine	28	0.823529	1	1	1	1	0	1	1	1	1	1	1	1	1	1	1	0	1	1	1	1	1	0	1	1	1	1	0	1	0	1	1	0	1	1
46	Direct-To-Consumer Genetic Testing (DTC-GT)	29	0.852941	1	0	1	1	0	1	1	1	1	1	1	1	1	1	1	1	1	1	1	0	1	1	1	1	1	1	1	1	1	1	1	0	0	1
47	(Mammalian) Microbiome Engineering	24	0.705882	Y	1	1	1	0	1	1	1	1	1	1	0	1	1	0	1	1	0	1	1	1	0	0	1	1	0	1	1	1	1	1	0	1	0
48	Using DNA Origami for Enhanced Drug Delivery	20	0.588235	0	0	1	0	1	0	1	1	1	0	1	0	0	1	0	0	0	1	1	1	1	0	1	1	1	1	0	1	0	1	1	1	0	1
49	Discovering New Antibiotics Through Novel Soil Screening	18	0.529412	0	0	1	0	1	1	1	1	0	1	1	0	1	0	1	0	1	1	0	1	1	0	0	1	1	1	1	0	0	0	0	0	1	0
50	Fighting Disease with Nanorobots	17	0.5	N	0	1	0	0	0	1	1	1	1	1	1	1	0	0	0	0	1	1	0	1	0	0	1	1	0	0	1	1	0	1	0	0	1
51	Virus Resurrection	25	0.735294	1	1	1	1	1	1	1	1	0	1	0	1	1	1	0	0	1	1	1	0	1	1	1	1	1	0	1	1	1	0	1	0	0	1
52	Genetically Engineered Phage Therapy to Disrupt Human and Animal Infections	23	0.676471	0	1	1	1	0	0	1	1	1	0	0	0	1	1	1	0	1	1	1	1	1	0	0	1	1	1	1	1	1	0	1	1	1	0
53	Multiple Coinfections and Immune Response	10	0.294118	0	0	0	0	0	1	0	1	0	0	1	0	1	1	0	0	0	1	0	0	1	0	0	1	1	0	0	0	0	0	0	0	0	1
54	Function-Based Design in Protein Engineering	20	0.588235	1	1	1	1	1	0	1	1	1	1	0	0	1	1	0	0	1	0	1	1	1	0	1	1	1	0	0	0	0	1	1	0	0	0
55	Protection vs Efficient Exploitation of Genomic Information	29	0.852941	1	1	1	1	0	1	1	1	1	1	0	1	1	1	0	1	1	1	1	1	1	0	1	1	1	1	1	1	1	0	1	1	1	1
56	The Regulation of Human Germline Engineering	28	0.823529	1	0	1	1	1	0	1	1	1	1	1	1	1	1	0	1	1	1	1	1	1	1	1	1	1	1	1	1	0	0	1	1	0	1
57	Human Genomics Overlapping with Other Emerging Technologies	23	0.676471	1	0	1	1	0	1	1	1	1	0	1	0	1	1	0	1	1	1	1	0	1	0	1	1	1	1	0	1	0	0	1	0	1	1
58	Changing Norms in Bioengineering due to Multipolarity	16	0.470588	0	0	1	0	1	0	1	1	0	1	1	0	1	1	0	0	1	1	1	0	1	0	0	0	1	0	0	1	1	0	1	0	0	0
59	Coordinating the International Governance of Biological Engineering and AI	20	0.588235	1	0	1	0	0	1	1	1	0	1	1	0	1	1	0	0	1	1	1	0	1	1	1	0	1	0	0	0	0	1	1	0	1	1
60	Moving Towards Governance Mechanisms on Synthetic Biology	22	0.647059	0	1	1	1	0	1	1	1	0	1	1	1	1	1	1	0	1	1	1	0	1	0	0	1	1	0	0	1	0	0	1	0	1	1
61	Additive Manufacturing	25	0.735294	1	1	0	1	1	0	1	1	1	1	1	1	1	1	0	1	1	1	1	0	1	0	1	1	1	0	0	1	1	0	1	1	1	0
62	Bio-Based Production of Materials	28	0.823529	1	1	1	1	0	1	1	1	1	1	1	1	1	1	0	1	1	1	1	1	1	0	0	1	1	1	1	1	0	1	1	1	0	1
63	Directed Evolution	22	0.647059	0	1	1	1	0	0	1	1	1	0	1	1	1	1	0	1	1	0	1	1	1	0	0	1	1	0	0	1	0	1	1	1	0	1
64	DNA Storage and Novel Sensing and Biocomputing Methods	29	0.852941	1	1	1	1	1	1	1	1	1	1	1	1	1	1	0	1	0	1	1	1	1	0	0	1	1	1	1	1	1	1	1	1	0	1
65	Multicellular Engineered Living Systems	17	0.5	0	1	1	0	0	1	1	1	0	1	1	0	1	1	0	0	0	0	1	0	1	0	0	1	1	1	0	1	0	0	1	0	0	1
66	Understanding and Engineering Microbial Consortia/Non-Axenic Microbial Systems	21	0.617647	1	1	1	0	0	1	1	1	1	0	1	0	1	1	1	0	1	0	1	1	1	0	0	1	1	0	1	1	1	0	1	0	0	0
67	Weaponized Bio Narratives	21	0.617647	1	1	1	0	1	1	0	1	0	1	1	1	1	1	0	0	1	0	1	1	1	0	1	1	1	0	0	0	0	0	1	1	0	1
68	The Regulation of Cognitive Enhancement	21	0.617647	0	0	1	1	1	0	1	1	1	1	0	0	1	1	0	1	0	1	1	0	1	0	1	1	1	0	0	1	1	0	1	0	1	1
69	Enforcement of Standardization in Biological Engineering	26	0.764706	1	1	1	1	1	0	1	1	1	0	1	1	1	1	0	0	1	1	1	1	1	0	0	1	1	1	1	1	0	1	1	0	1	1
70	Improved Regulation of Genetically Modified and Genetically Engineered Crops	30	0.882353	0	1	1	1	1	1	1	0	1	1	1	1	1	1	1	1	1	1	1	1	1	1	1	1	1	0	1	1	1	1	1	0	1	1
71	Governance and Oversight of Genome Editing	32	0.941176	1	1	1	1	1	1	1	0	1	1	0	1	1	1	1	1	1	1	1	1	1	1	1	1	1	1	1	1	1	1	1	1	1	1
72	Regulating Biohacking/DIY Biology	29	0.852941	0	1	1	1	1	0	1	0	1	1	1	1	1	1	1	1	1	1	1	1	1	1	1	1	1	0	1	1	0	1	1	1	1	1
73	Further Development and Formalisation of a Bioengineering Code of Ethics	18	0.529412	0	0	1	0	1	1	0	0	0	1		0	1	1	0	1	1	0	1	0	1	0	0	1	1	1	0	1	0	0	1	1	1	1
74	Increasing Need for the Effective Science Communication of Emerging Technologies Such as Gene Drives	29	0.852941	1	1	1	0	1	1	1	0	0	1		1	1	1	1	1	1	1	1	0	1	1	1	1	1	1	1	1	1	1	1	1	1	1
75	Challenged Regulatory Definitions	22	0.647059	0	1	1	1	0	1	1	0	1	1		1	1	1	0	1	1	1	1	0	1	1	1	1	1	0	1	1	0	0	0	0	0	1
76	Regulating Data Storage, Protection and Use	28	0.823529	1	1	1	1	0	1	1	0	1	1		1	1	1	1	1	1	1	1	0	1	0	1	1	1	1	1	1	0	1	1	1	1	1
77	Data Management Support for Biomedical Research	22	0.647059	1	1	1	0	1	1	1	0	0	1		0	1	1	0	1	1	0	1	0	1	0	0	1	1	1	0	1	0	1	1	1	1	1
78	Information Hazards	24	0.705882	1	1	1	1	1	1	1	0	0	1		1	1	1	0	1	0	1	1	0	1	1	0	1	1	0	1	1	1	0	1	0	1	1
79	Ensuring the Responsible Governance of Engineering Biology Scale-Up	20	0.588235	0	1	1	0	1	0	1	0	1	1		0	1	1	1	0	1	1	1	0	1	1	0	1	1	0	1	1	0	0	0	0	1	1
80	What Future/s for Responsible Research and Innovation?	23	0.676471	0	0	1	0	1	1	1	0	1	1		0	1	1	1	0	1	1	1	0	1	0	0	1	1	1	1	1	0	1	1	1	1	1
81	Changing Economies of Bioscience	22	0.647059	1	1	1	0	0	1	1	0	1	1		1	1	1	0	0	1	1	1	0	1	0	1	1	1	0	1	1	0	0	0	1	1	1
82	Demand-Driven Public Support for Critical Public Missions	14	0.411765	0	1	0	0	0	0	1	0	1	0		0	1	1	1	0	1	0	1	0	1	0	0	1	1	0	0	1	0	0	0	1	0	1
83	Divergent Narratives and Reactive Responses	17	0.5	1	1	0	1	1	0	0	0	0	1		1	1	1	0	0	1	1	1	0	1	0	1	1	1	0	0	1	0	0	0	0	1	0

## Sheet: Score 1 Standardised 
No.	ISSUE	SCORE 1	SCORE 2	SCORE 3	SCORE 4	SCORE 5	SCORE 6	SCORE 7	SCORE 8	SCORE 9	SCORE 10	SCORE 11	SCORE 12	SCORE 13	SCORE 14	SCORE 15	SCORE 16	SCORE 17	SCORE 18	SCORE 19	SCORE 20	SCORE 21	SCORE 22	SCORE 23	SCORE 24	SCORE 25	SCORE 26	SCORE 27	SCORE 28	SCORE 29	SCORE 30	SCORE 31	SCORE 32	SCORE 33	SCORE 34	AVERAGE	RANK
1	Benefit Sharing and Infectious Disease	0.817224	-0.325722	1.0401	-1.1642	-0.857816	-0.641533	0.573396	0.651841	-1.32148	0.678834	-0.493786	0.771114	0.155684	-0.876506	-1.03006	-1.65314	-0.336631	0.251232	0.356086	1.43188	1.10941	-1.14364	-1.64951	-0.129086	-0.0788891	0.530708	-0.997974	1.50995	-0.727607	-0.773753	0.695672	-1.08297	-1.06794	0.859793	-0.144686	60
2	Bioengineering Challenging Benefit-Sharing under the Nagoya Protocol	0.0437414	-0.384377	1.43246	-0.455638	-1.12051	0.678647	0.573396	0.497672	-1.10241	-0.229049	-0.409572	0.88085	0.0773225	-0.895949	0.426039	-1.23144	0.738689	0.242824	0.253606	1.4347	0.422042	-1.16571	-0.0700299	-0.320753	-0.020006	0.288941	0.938194	1.48413	0.373622	-0.710723	-1.01031	-0.581062	-1.55541	-0.445873	-0.0271157	46
3	Bioengineering and Low- and Middle-Income Countries (LMICs)	0.406312	-0.405706	1.10046	-1.14648	-1.25186	1.11871	0.573396	0.549062	-1.24845	0.134104	-0.886786	0.33217	-0.00103852	0.87332	-1.03421	-2.22713	0.917909	-0.0346457	-0.258792	1.46289	-1.44367	-0.658012	-1.25464	-0.512419	-0.196655	1.01424	0.722084	1.07748	-0.176993	-0.931329	-0.747848	-0.079156	-0.809868	-0.486675	-0.162065	63
4	Democratization of Genome Editing Tools	-2.37339	-0.261734	1.16083	1.33347	0.324305	1.11871	0.747152	0.446283	0.248547	-0.955355	1.09576	-1.42361	0.038142	-1.45978	-0.403647	0.115657	-0.515852	-1.93489	0.919725	-0.905126	-0.854495	-0.547643	1.11458	-0.704086	1.3343	-1.40343	-0.773043	-1.51734	0.0983145	1.43231	-1.01968	2.43037	-2.53035	0.900595	-0.138953	59
5	Broadening Access to Biotechnology	-0.0771153	-0.411039	1.13065	0.15018	-1.07673	-1.96171	0.573396	0.405172	0.13901	-0.592202	-0.651688	0.551642	0.116503	-1.26536	-0.519803	1.14063	-0.157411	0.116701	-0.719951	-0.950231	-1.34547	-0.534399	-0.859769	-0.895752	-0.255538	0.530708	-0.248205	-1.63352	-0.562422	-0.899814	-0.26355	-0.079156	-1.55541	-0.731488	-0.393916	77
6	Genetic Essentialism, False Narratives and Rising Nationalism	1.25714	-0.00578204	1.58337	1.32285	-1.73346	1.11871	0.747152	1.26851	0.978792	-0.156418	-1.72191	-0.984663	-2.27351	-1.30424	-1.02591	-2.69568	0.953753	0.806172	0.663525	-0.947412	-1.3782	-0.50791	0.32484	-1.08742	-0.997464	0.047174	-0.424621	0.461049	0.538806	-0.915571	1.14248	-0.581062	0.91061	-1.79234	-0.18849	68
7	Responsible Stewardship and the Nagoya Protocol	-0.391343	-0.395042	0.798648	-1.14648	-1.33942	0.238587	-0.295386	0.394894	-0.299136	-1.13693	0.0781687	-1.86255	-1.41154	-0.915391	0.63346	-1.22559	1.45557	0.40258	-0.87367	1.42061	0.454774	-0.578546	-1.62582	-1.27909	-0.0494475	1.01424	0.920553	1.46477	-0.562422	-0.805268	-0.63849	-0.581062	-0.867218	-0.445873	-0.277908	74
8	A Commons Approach Adopted to Certain Genetic Resources in International Governance	0.140427	3.0603	0.436469	-1.12877	-1.60211	0.238587	0.573396	0.626146	0.759718	-1.50008	0.979962	0.766725	-1.37236	-1.07093	-1.05495	1.1582	0.846221	0.856621	1.07344	1.43752	0.438408	1.32863	-1.61002	-1.47075	-0.385081	0.530708	0.898501	1.4454	0.924236	1.11715	0.551945	0.42275	0.795911	-0.405071	0.288449	8
9	Widening Global Inequality	-1.11648	-0.389709	-1.33519	-1.2634	-0.835925	-0.201473	0.39964	1.02698	-1.72311	0.86041	-1.85174	0.441906	-0.604419	0.834435	-1.23333	-2.30912	-1.77039	-0.202809	-1.23235	-0.888211	-1.4764	-0.490251	0.482788	-1.66242	0.09776	-0.919894	0.303096	1.43249	-0.83773	-0.962844	0.420716	1.42656	-2.70239	-0.486675	-0.552044	82
10	Advances in AI and Computational Techniques Applied to Protein Folding	-0.70557	-0.453697	-0.770794	0.440689	1.30941	-1.08159	0.747152	-0.530116	0.905767	-1.5364	0.0325527	-0.545719	0.563161	1.26217	-0.399499	1.21677	-0.58754	1.52928	0.509806	0.104102	-0.494446	-0.348979	-2.04438	1.78758	-1.25655	-1.40343	1.14107	0.0769906	0.428683	-0.947086	-1.21965	-0.079156	0.337117	-0.527477	-0.0746996	53
11	Dual-Use Concerns from Applying Machine Learning to Biotechnology	-1.59991	-0.277731	-0.619886	0.802055	1.26562	-1.08159	1.09466	-0.273169	0.79623	-0.410626	0.734338	-0.326247	0.962802	-1.49867	0.218617	1.33391	-1.41195	0.688458	0.714765	-0.735981	-0.461715	-0.591791	0.00894403	1.02091	0.13309	0.047174	1.33954	0.0576263	1.19954	1.12661	-1.46961	0.924655	-0.523122	1.47182	0.137041	25
12	Using AI for Data Standardization, Integration, and Valuation in Biotechnology	0.720539	-0.416371	-1.07261	-1.04374	-0.638904	-1.08159	-0.642898	-0.375948	1.3074	-0.773779	-0.230617	0.88085	-0.706288	0.803327	-0.299936	0.549072	0.989597	0.696866	1.2784	-0.764172	-0.428983	-0.296002	-2.00489	0.63758	0.227303	-1.40343	0.611824	-0.00046661	1.36473	-0.776905	1.03624	0.42275	-2.3583	1.39022	-0.0705626	52
13	Full Genome Synthesis and New Industrial Organisms	-0.00460129	-0.485691	0.134653	0.543431	0.455652	0.678647	1.09466	-0.478726	0.0659859	-0.0474724	0.937855	0.529695	0.555325	0.290045	0.322328	1.36319	-0.444164	-0.976362	1.68832	-0.938954	-0.854495	0.984279	0.561761	1.78758	0.0683185	1.01424	1.42334	-0.00692138	1.2546	1.46382	-0.725976	1.92847	0.681213	1.34942	0.476867	3
14	Industrial Sabotage in the Bio-Economy	0.212941	-0.283063	0.768467	-0.0163314	-1.60211	0.678647	-0.642898	0.728925	-1.13892	-1.24588	0.769427	-1.53334	-3.76237	0.756665	-1.36608	0.402648	-1.77039	-0.98477	0.458566	-0.924859	-0.821764	1.06374	-1.21515	1.02091	0.156643	0.530708	-0.777454	-1.35597	0.979297	-0.928177	-0.769719	-1.08297	-1.03927	0.451772	-0.420062	78
15	Outsourcing in Biotechnology	0.793053	-0.267066	1.22119	1.56376	1.11239	0.238587	0.573396	-0.473588	-1.02938	-0.882725	1.28173	0.924744	-1.33318	0.601125	-1.33704	1.33976	-0.802604	0.713682	1.73956	-0.7388	-1.41093	-0.260684	-0.227978	0.63758	-0.402746	0.530708	0.501564	1.52931	1.06189	-0.921874	0.00203281	-0.079156	0.262563	1.18621	0.224914	16
16	Edible Vaccines for Intensive Agricultural Systems	0.237112	-0.45903	-0.227526	-0.788661	-1.29564	1.11871	-0.990411	-0.581505	0.321572	-1.02799	-0.700813	0.749167	0.939294	0.776108	1.0483	-0.83317	0.559469	1.53768	0.766005	1.7448	1.10941	0.657586	0.640735	0.254247	0.286186	0.530708	1.07492	-0.60076	1.44732	1.58988	1.15185	1.92847	1.22603	0.247762	0.424642	5
17	Attacking the Central Nervous System	0.38214	-0.357715	0.0742903	1.05005	1.3313	0.238587	1.09466	-0.0676111	-0.481697	1.40514	0.622052	-1.64308	0.860933	-2.22582	-1.12962	-0.745316	-0.623384	1.19295	0.571294	-0.121424	-0.887227	1.4699	-1.20725	1.78758	0.297962	0.772475	-1.24055	-0.04565	1.47485	-0.943935	-0.529133	-1.08297	-0.00697865	1.43102	0.0799362	32
18	Bioengineering and Environmental Bioweapons	-1.21317	-0.213743	0.677922	-1.21734	0.0178294	0.678647	1.09466	0.960177	0.686694	1.76829	1.28875	0.617483	0.900114	-1.65421	-0.777006	0.759923	-0.659228	1.26862	0.576418	0.729936	-0.690837	1.47432	-0.836077	1.40425	0.262632	0.772475	0.986709	0.109264	-0.149462	-0.956541	-0.988435	0.924655	0.021696	1.30862	0.292178	6
19	Bioengineering and Exotic Biological Weapon Systems	-1.6966	-0.219075	0.527014	-1.189	0.499434	-1.96171	0.747152	0.471978	0.577157	1.80461	1.19752	0.639431	1.09602	1.06775	-0.756263	1.00592	-0.641306	1.10887	0.581542	-0.0171182	-0.658105	1.52729	0.798683	0.63758	0.321515	1.01424	-0.336413	-0.0650143	0.401152	-0.959692	-0.507261	0.42275	0.0561056	1.26781	0.257763	12
20	Defensive Developments in the Emerging Biotechnological-Environmental-Engineering Complex	0.430483	-0.22974	-0.49916	0.74537	-0.419993	-1.96171	1.09466	1.02184	-0.737283	1.58672	0.0781687	0.573589	0.774736	0.737223	0.114906	0.935632	-0.637721	0.0998851	0.986336	0.738393	0.749359	1.42575	-0.0226455	0.254247	0.0859834	0.772475	0.633876	1.14203	-0.727607	-0.962844	-0.182313	-0.079156	-0.505917	1.30862	0.274241	9
21	Toxin Weapons: Falling Between the CWC and BTWC	-0.052944	-0.20841	0.548141	-1.03311	1.0686	0.678647	0.747152	-1.03373	-0.664259	1.04199	-1.74998	0.222434	-0.236122	-2.23359	-1.37438	-0.136192	-0.648474	-0.236442	0.586666	0.101283	-0.494446	-0.216536	-1.51525	-0.129086	0.309739	-1.40343	-1.61543	-0.0779238	0.0322408	-0.984904	0.467584	-0.581062	0.555044	1.22701	-0.265858	71
22	Adding New Sensorial Capabilities into the Brain	0.74471	-0.149755	0.466651	-0.395411	-1.03294	1.11871	0.747152	0.240725	0.212035	-0.882725	1.24664	-2.08202	1.3311	0.783885	-0.0136948	-1.91085	0.559469	-0.993178	0.817245	0.732755	0.215832	-0.287172	0.11161	1.78758	0.627707	-1.40343	-0.137945	-0.116652	1.55744	1.18018	-0.222931	-0.581062	0.0847802	0.982199	0.157019	24
23	Biomimetic Strategies for Human-Machine Interfaces	-0.125458	-0.176416	-0.484069	0.0297249	0.630781	-1.96171	0.747152	0.292115	0.46762	0.315681	1.25717	-1.20414	1.29192	0.768331	-0.60692	-0.75703	0.523625	-0.404606	0.842865	-0.299025	0.242018	-1.073	0.166892	1.40425	0.568824	-1.40343	-0.834789	-0.103743	2.02546	1.2117	-0.285421	-0.581062	0.560779	0.982199	0.118479	27
24	Cognitive-Enhancing Drugs and the Microbiome	0.91391	-0.203078	0.970683	-0.88786	1.17806	-1.96171	0.920909	-0.324558	1.41694	-0.337995	0.0360616	-1.64308	-0.86301	0.772219	-1.27482	-1.13188	0.667001	-1.53971	0.868485	-0.6796	0.245291	-0.0840932	0.861862	1.02091	0.539383	-1.40343	-0.812737	-1.64643	1.75016	1.36927	-0.0635818	-2.08678	1.3694	0.574179	-0.043224	49
25	Outsourcing Risk Through Cyberbiosecurity	0.261284	-0.272398	-1.01225	-1.25985	-0.244864	-1.96171	-0.295386	0.934483	0.540645	-1.35482	0.699248	-1.31387	0.743391	0.787773	-1.08814	1.36905	-0.695072	-1.16134	-0.156312	-0.682419	0.54315	0.935716	-0.851872	-0.129086	0.186085	-1.40343	-0.512829	-0.1812	0.676459	-0.896662	1.21122	-1.08297	1.26618	1.18621	-0.1534	62
26	Partial Take-Up of Cyberbiosecurity Measures Will Leave Significant Areas of Vulnerability in the Bio-Economy	-0.633056	-0.288395	0.979738	-1.27048	-0.266755	0.678647	-0.295386	0.94476	0.650182	-1.28219	-0.286759	-1.35777	-0.815993	0.791662	-1.09229	0.689639	-0.712994	-0.825014	-0.771191	-0.676781	0.487506	1.41693	-0.0779273	-0.512419	-0.131884	-1.40343	1.31308	-0.239293	-0.204523	-0.902965	-1.48523	-0.581062	-0.339604	0.533376	-0.234349	70
27	Carbon Pricing as a Driver of the Bioeconomy	0.865567	4.66	0.705085	-1.17128	-0.638904	1.55877	0.225883	-0.298864	1.56299	1.15093	-0.992053	-0.918821	-1.80334	0.807216	1.50463	-0.147906	1.02544	-0.572769	-0.771191	0.0956446	-1.18181	1.63766	-1.72848	-0.512419	-1.55096	-1.40343	0.413356	-0.258657	0.125845	0.486852	-0.544755	0.42275	1.08266	-0.609082	0.0948984	30
28	Carbon Sequestration Through Enhanced Photosynthesis, Including Through Synthetic Metabolic Engineering	1.22814	-0.341719	-0.737594	0.904796	-0.682687	1.55877	0.39964	0.225309	-0.1896	1.91355	1.08874	0.266328	-0.0245468	0.814993	1.4424	0.531502	0.595313	1.27703	0.970964	1.49108	1.40399	1.47873	0.624941	-0.129086	0.333292	0.530708	1.41452	-0.620124	0.456214	-0.679208	-0.544755	-0.581062	1.18015	-0.9763	0.488954	2
29	Crops for the New Climate	0.938081	-0.347051	0.00487269	-0.898488	-0.0259529	-0.201473	-0.295386	0.523367	0.394596	0.315681	0.85715	-0.435983	0.782572	0.799439	-1.28311	0.683783	1.09713	-1.834	0.714765	1.80118	1.42036	1.07257	0.47489	1.40425	0.274409	1.01424	1.62622	-0.665308	-0.810199	-0.868298	-0.0917023	-0.079156	-0.0930026	0.614981	0.261336	11
30	New Techniques to Develop Resource-Efficient, Environmentally Sustainable Animal Feed	1.03477	-0.235072	-0.333161	0.678057	-0.113517	1.55877	-0.295386	0.00947299	0.723206	-0.0111571	-1.71489	-0.326247	-1.56826	-2.1986	-1.39927	0.613499	-0.300787	1.57132	0.740385	-0.955869	1.37126	0.895983	0.0247388	-1.94992	0.345069	0.530708	0.942605	-0.678217	-0.700076	-0.770602	-0.176064	-0.079156	1.31779	0.614981	-0.0245189	45
31	Meeting the Growing Demand for Biomass and Feedstock	1.39734	-0.160419	-1.16617	1.51061	-0.726469	1.11871	-0.295386	1.03726	1.5995	0.206735	0.393972	-1.0944	-1.64662	0.818881	-1.22504	0.408505	-0.67715	-0.0682785	-0.514991	1.01184	1.38763	0.648757	0.048431	-1.85408	1.62872	0.772475	0.964657	1.38731	-0.86526	1.36927	-0.904073	-0.581062	0.618128	0.329366	0.202315	19
32	Phytoremediation of Contaminated Soils	0.285455	-0.352383	-1.13297	0.0864097	0.762128	0.678647	-0.295386	0.0608624	1.0153	-0.192734	-0.300795	-0.216511	0.273225	0.764442	0.401148	0.742352	1.06129	2.03377	0.678897	1.77299	0.877013	1.31097	0.127405	1.02091	0.745473	1.01424	1.29544	-0.684672	0.87468	-0.647693	0.461335	-0.079156	0.996634	0.166158	0.458967	4
33	Establishment of the Biotechnological-Environmental Engineering Complex	-0.923112	-0.224407	-1.10279	-1.10397	0.80591	-1.96171	-2.03295	1.06296	-0.116575	0.606203	-1.76051	-1.53334	-1.09809	0.56224	-0.706482	-1.13188	-2.11091	-1.03522	-1.79599	-0.927678	0.782091	-0.243025	-0.25167	-1.66242	-2.19868	0.530708	-0.817147	1.36794	-2.37394	-0.679208	-1.48523	-1.08297	0.0847802	1.30862	-0.683778	83
34	Tackling Climate Change by Engineering Plant Roots	0.454654	-0.336386	-1.11788	1.52124	1.09049	0.238587	-1.16417	-1.02859	0.102498	0.533573	0.0781687	1.21006	0.265389	0.811104	-1.42001	-0.0659084	-2.05714	0.81458	1.34502	1.47699	1.43673	0.997523	-0.0463377	-0.895752	0.863239	-1.40343	1.42775	-0.697582	1.09493	-0.676056	-0.176064	-0.581062	1.19162	0.20696	0.16161	23
35	Engineered Alternatives to Ecosystem Services Competing with the Original and/or Creating Moral Hazard	0.0679127	-0.165752	1.25137	-0.891402	0.718345	-1.96171	-0.990411	0.482256	-1.61358	1.25988	0.590472	0.222434	0.0538142	0.779996	0.280844	1.32805	1.04336	-0.194401	0.827493	-0.623219	-0.674471	-0.525569	0.0405336	-1.27909	0.981005	-1.40343	-1.04208	0.922565	-1.76827	-0.609874	0.980002	-1.08297	0.990899	0.492574	-0.0444825	50
36	Sustainability Claims Neither Validated nor Realized	0.672196	-0.155087	1.18195	-0.735519	0.937257	-1.96171	-2.03295	1.21712	-1.50404	0.896726	-1.56401	0.266328	-2.63397	0.212275	0.28914	-0.417326	1.00752	1.48723	-1.74475	-0.89103	1.45309	-0.543228	-1.62582	0.254247	1.80537	-1.40343	1.16312	1.34858	-1.27271	0.332428	1.06749	-1.58487	1.24897	0.41097	-0.0828949	54
37	Using Bioengineering for Enhanced Recycling and the Circular Economy	-0.173801	-0.245737	0.300652	-0.611521	0.346196	1.99883	-2.03295	1.08865	1.23438	0.969356	0.979962	1.2759	1.00982	0.25116	-0.416092	0.385078	1.07921	-2.50665	-1.59103	0.876527	1.32216	-0.529984	-0.275362	0.63758	0.121313	-1.40343	1.60417	-1.36242	-0.722101	0.96273	1.13623	-0.079156	0.881935	0.288564	0.200005	20
38	Live-Plant Dispensers of Chemical Signals	-0.246315	-0.421703	0.376106	0.713485	0.959148	1.55877	-2.03295	-0.555811	-0.919844	0.751464	0.755391	0.573589	-0.72196	0.760554	-1.37853	-0.721888	-0.40832	1.15091	0.955593	1.50518	1.27307	1.51846	-0.0226455	0.63758	0.16842	1.01424	0.104628	-0.742765	1.75566	-0.798965	0.480082	-0.581062	0.623863	-1.58833	0.191033	21
39	Agricultural Gene Drives	-1.88997	-0.491024	1.25137	0.515088	0.827801	-0.201473	1.44218	0.0197509	1.38043	1.44146	-0.7745	0.661378	-1.11377	0.745	-0.0593275	-0.376327	-0.372476	0.394171	0.458566	0.727117	0.458047	0.798859	-0.338541	0.254247	0.68659	0.530708	0.973477	-0.297386	-1.98851	1.53	-0.935318	-1.08297	-0.0413882	0.818991	0.175066	22
40	Mammalian Gene Drives	-2.13168	-0.448365	1.43246	-1.22443	1.09049	-0.201473	1.44218	0.985872	1.27089	-0.0111571	-0.311322	0.529695	-1.09026	-0.254346	-0.0759212	-0.3529	-1.94961	-0.0766866	0.43807	-0.944593	0.46132	0.600195	-0.330644	-0.129086	0.657149	0.530708	-0.446673	-0.290931	-0.391732	1.62455	-1.11341	-1.58487	0.142129	0.778189	-0.0404763	48
41	Plant-Inspired Designer Molecules for Medicine, Agriculture and Industry	-1.16483	-0.496356	-1.19334	-1.25985	-1.09862	1.99883	1.44218	1.01157	-1.43102	-0.846409	-0.465715	0.705272	0.759064	-1.24591	0.753764	0.677926	1.43765	-0.0178294	0.0998869	1.84347	1.32544	-0.273928	-2.00489	-0.512419	0.509941	0.530708	-0.883303	-1.65289	-0.501855	-0.978601	-0.832209	-1.08297	0.801646	-0.649884	-0.138102	57
42	T-DNA Transgene-Insertion Genetic and Epigenetic Impacts in Plants	1.25231	-0.507021	-1.34424	0.74537	0.468787	-0.201473	0.573396	0.199614	-1.35799	0.0977888	-1.05872	0.244381	-0.988388	-0.0793629	0.911405	-1.659	1.11505	0.0662524	-0.591851	-0.958688	-0.523905	-1.05976	-0.243773	-0.895752	-0.125995	-0.678127	-0.95387	1.33567	-1.60308	1.39449	1.15185	-0.079156	1.20309	-0.568279	-0.138794	58
43	Bioengineered Replacement Organs	0.55134	-0.443033	-0.568577	0.911881	-0.74836	1.11871	-0.295386	-0.0419164	1.19786	-1.57272	1.08874	1.31979	1.37028	0.17339	1.0649	0.203512	0.236873	-0.858647	-0.105073	-0.397693	0.13073	0.662001	-0.79659	0.254247	1.51095	1.01424	-1.52722	-1.6658	1.75566	-0.707571	-1.13841	-0.079156	-1.48659	-0.364269	0.0520031	36
44	DIY Pharma	-0.778084	-0.36838	0.237271	1.86844	-1.51455	-0.201473	0.747152	1.00643	-0.226112	-1.24588	0.120276	1.53927	0.845261	-0.526541	-0.266749	0.613499	-1.84208	-1.69946	-0.97615	-0.10169	1.44	1.08582	-1.27833	1.78758	1.45207	0.530708	-0.380517	-0.32966	0.213943	-0.950238	-0.67286	0.924655	-0.781194	1.023	0.0381003	39
45	The Rise of Cell Therapies and Personalised Medicine	-0.729742	-0.400374	0.198035	-0.44501	-1.62401	0.678647	0.39964	-1.04401	1.48996	-0.91904	0.404499	0.376064	1.45648	0.95109	0.558788	0.22694	1.13297	-2.03579	0.842865	0.0928256	0.47114	-0.936142	-0.227978	-0.512419	1.27542	1.01424	0.281044	-0.271567	1.21056	1.70964	1.27058	0.42275	-0.138882	1.0638	0.242442	14
46	Direct-To-Consumer Genetic Testing (DTC-GT)	-0.294657	-0.293728	0.40327	1.15279	0.105394	0.238587	-0.295386	1.11435	1.45345	-1.57272	-1.60261	0.134645	-0.392844	-0.448771	1.87799	0.209369	1.1509	-2.11987	0.38683	-0.95305	-0.190041	-0.159144	1.62791	-0.895752	-0.985687	0.530708	0.325148	0.599827	-0.281609	1.01	1.31432	-0.079156	0.738562	0.737387	0.133718	26
47	(Mammalian) Microbiome Engineering	1.20397	-0.427036	1.3057	-0.600893	0.586999	-0.641533	0.225883	-1.0697	0.358084	-1.28219	0.66065	0.72722	-0.447697	0.4067	-1.28726	0.250367	1.38388	-1.78355	0.868485	0.0984637	1.10941	1.09023	0.538069	0.63758	-2.78751	-0.43636	-0.159997	-0.19411	0.549818	1.5363	-0.160441	-0.079156	0.09625	-1.54753	0.021444	41
48	Using DNA Origami for Enhanced Drug Delivery	0.188769	-0.197746	-0.0524723	-0.257242	1.15617	-0.201473	0.747152	-0.0213607	0.0294737	-0.937198	1.32735	0.749167	-0.502549	0.278379	-0.457577	-1.08502	1.10788	-0.690484	0.699393	0.724298	-0.0525679	1.60234	-0.393823	-1.66242	-0.45574	0.288941	0.148732	-1.37533	1.4308	-0.572056	1.07686	-0.581062	0.423141	-0.77229	0.0503071	37
49	Discovering New Antibiotics Through Novel Soil Screening	0.962253	-0.192413	-0.535378	0.59303	1.24373	-0.201473	0.39964	-0.0110828	-1.06589	0.642518	0.0500973	0.134645	0.570997	0.970533	-0.00124953	-1.55358	-0.264943	-0.101911	1.84204	1.57848	1.17487	1.02843	-0.804487	-0.129086	0.356845	1.01424	1.58211	-0.775039	1.26562	-0.603571	-0.98531	0.42275	0.635333	0.655783	0.291133	7
50	Fighting Disease with Nanorobots	1.30065	-0.181749	-0.502178	-0.119073	-1.1424	0.238587	0.0521269	-1.15193	-1.57706	-0.446941	0.906275	-1.31387	1.27625	-0.118248	-0.980279	-0.511037	1.11147	-0.606402	-0.0538327	-0.896668	-0.851222	-0.538813	0.932939	-1.27909	-3.08192	0.047174	-0.715708	-0.781494	0.604879	1.68127	-0.888451	-0.581062	0.600924	0.370168	-0.270492	72
51	Virus Resurrection	-0.87477	-0.373712	-0.405597	-1.30591	1.50643	-0.641533	1.09466	0.487395	1.52647	0.0251582	1.07821	-0.831033	-0.377172	-1.53755	1.09808	0.953203	-0.354554	0.99956	0.637905	-0.614761	1.15196	-0.984704	0.466993	1.40425	0.127202	-1.40343	-1.35081	0.574008	-0.496349	-0.45545	0.523825	-0.581062	0.0503706	1.14541	0.0665501	35
52	Genetically Engineered Phage Therapy to Disrupt Human and Animal Infections	1.44568	-0.379045	1.00992	0.465489	0.324305	-1.08159	0.920909	-0.0316385	1.12484	1.0783	0.983471	1.14422	0.790408	0.0567347	1.39262	0.238654	-0.365307	1.16772	1.74469	1.70252	0.0685395	-1.02444	0.0168414	-1.85408	0.392175	1.01424	1.31749	0.244815	-0.545904	1.53315	1.63927	2.43037	0.595189	0.941397	0.602999	1
53	Multiple Coinfections and Immune Response	-0.971455	-0.187081	-0.994138	0	0.368087	-0.201473	-0.295386	-1.02345	-1.6866	0.0251582	-1.46225	0.749167	0.328078	0.153947	-0.523951	-1.00888	-0.368891	0.72209	-0.171684	-0.941774	-1.18509	1.19619	-1.04931	-1.96908	0.180196	-1.40343	-0.556933	-1.00741	-0.353189	-0.672905	-0.279172	-0.581062	-0.494447	0.125356	-0.457082	80
54	Function-Based Design in Protein Engineering	0.889738	-0.501688	-1.31104	1.85427	1.28751	-0.641533	0.573396	-0.524977	-0.956356	0.152262	0.186945	-1.48945	0.414275	1.22329	0.782803	1.10548	-0.838448	1.5545	-0.87367	-0.71061	-0.396251	0.745882	-0.22008	0.63758	-1.06812	1.01424	-0.292309	-0.213474	-0.160474	1.12031	-1.24464	-0.079156	0.91061	-1.42512	0.0442846	38
55	Protection vs Efficient Exploitation of Genomic Information	-0.149629	-0.309725	1.11555	1.65233	0.389979	-0.201473	-1.33792	-0.0264996	1.34391	-0.483256	0.457133	0.793061	0.712047	1.20384	1.38433	1.14648	1.14014	0.53711	-2.82079	-0.936135	-1.50913	-1.09507	1.59632	0.254247	-0.443964	1.01424	0.12668	-1.67225	-1.2562	1.33776	1.63927	-0.581062	-0.448568	-0.690686	0.114179	28
56	The Regulation of Human Germline Engineering	0.357969	1.46061	1.5713	0.564687	-1.22996	-0.201473	1.44218	0.980733	-0.372161	1.80461	1.19401	-1.0944	0.94713	-0.487656	0.0983128	-0.10105	0.702845	-0.303707	0.048647	0.106921	-1.50913	-1.04651	1.6674	-0.129086	1.09877	1.01424	-1.02003	-1.04614	0.00471007	-0.427087	1.38306	-0.581062	-0.0356533	1.10461	0.234342	15
57	Human Genomics Overlapping with Other Emerging Technologies	-1.40654	3.59354	1.23024	0.0261821	-0.967271	0.678647	0.920909	1.05782	-1.65009	0.0977888	-0.335884	1.36369	-0.957043	-0.837621	0.268398	-1.09088	1.03978	-0.219626	-0.617471	-0.933316	-1.50586	-0.291587	1.50945	-0.512419	-1.60985	1.01424	-0.182049	1.09684	1.65655	-0.395572	1.52679	-0.581062	-1.09661	-0.813092	0.0316774	40
58	Changing Norms in Bioengineering due to Multipolarity	1.73574	1.99384	1.33588	1.6417	0.652672	-1.08159	1.44218	-2.0718	0.285059	-0.574044	-1.47628	1.18811	0.108667	1.4566	0.608569	-1.67657	1.4018	-1.3211	-1.84723	-0.910764	0.307481	-0.569717	-0.291157	0.63758	0.0742068	-1.40343	-0.358465	1.30985	0.940754	-0.638238	-0.329164	-0.581062	1.4841	-0.853894	0.077067	34
59	Coordinating the International Governance of Biological Engineering and AI	-2.03499	4.12677	0.988792	-0.207642	-1.95237	0.678647	0.573396	-1.03887	-0.554722	1.85908	0.941364	1.29785	-0.432024	-2.18693	-0.648404	0.724781	0.720767	-0.228034	-1.89847	-0.907945	-1.14908	-0.265098	0.245866	0.254247	0.239079	-1.40343	0.603003	0.270634	1.32618	1.67812	-1.03843	-1.08297	0.428876	0.0845537	0.000370636	43
60	Moving Towards Governance Mechanisms on Synthetic Biology	-0.101287	-0.331054	0.87712	-1.32362	-0.879707	0.678647	-0.469142	-0.468449	-0.0070385	1.00567	1.09225	1.649	-0.369335	-0.818179	-0.142296	-1.10259	0.0934968	-0.900688	-1.12987	1.4488	0.13073	-0.278343	1.41468	-0.129086	-0.915028	-1.40343	-0.601037	-1.67871	-0.79368	-0.285269	-1.10717	0.924655	0.124925	0.0437516	-0.169155	65
61	Additive Manufacturing	-0.0287726	-0.4377	-0.369379	-1.10397	1.30065	-0.201473	0.747152	-2.08208	-0.262624	-1.17325	0.72732	-0.787138	0.923622	-0.390443	-0.445131	1.21091	0.577391	-1.15293	-0.566231	-0.92204	-0.782485	-0.225365	-0.765	1.02091	-0.903251	-1.40343	-0.790685	-0.794403	-1.80681	-0.846238	-1.48211	-0.079156	-1.67011	0.00294955	-0.440038	79
62	Bio-Based Production of Materials	0.527168	-0.432368	-0.266762	0.0297249	-0.398102	1.99883	0.573396	0.913927	0.869255	-0.555887	0.818552	1.14422	0.320242	-0.371001	-0.913904	1.22848	1.09354	-0.732525	0.484186	-0.0227564	-0.674471	1.48756	1.02771	1.40425	-0.314421	0.530708	0.192836	1.06457	0.395646	-0.950238	-1.21652	-0.079156	0.681213	-0.894696	0.263623	10
63	Directed Evolution	-0.439686	-0.512353	-1.27784	-1.17837	-0.923489	-0.201473	-0.642898	-1.06457	0.175523	0.24305	0.23607	-0.172616	0.16352	-2.04306	-1.24993	-0.0659084	-1.19689	0.511886	-2.10343	-0.919221	-1.50913	-0.318075	-0.425413	1.78758	0.191973	1.01424	-1.43901	-1.40115	0.285523	-1.02272	-1.44461	0.42275	-0.523122	-0.853894	-0.526375	81
64	DNA Storage and Novel Sensing and Biocomputing Methods	-1.06814	-0.475027	-1.17221	-1.24922	-1.2825	-0.201473	-0.121629	-1.0029	1.08833	-0.664833	1.10628	1.36369	0.735555	-0.196018	-0.81849	-0.973737	-0.282865	0.595968	0.509806	-0.916402	-1.50913	-0.300416	-0.291157	0.254247	0.922122	0.530708	1.4057	-0.813768	-0.650521	-0.143451	-1.39462	0.42275	0.652538	-0.0378525	-0.175843	66
65	Multicellular Engineered Living Systems	-1.0198	-0.464362	0.068254	1.3689	-1.32629	0.678647	-0.295386	-0.278308	0.504133	-1.0643	-0.672741	-0.0848273	1.36244	0.0178496	-0.677443	-1.21387	-0.605462	0.680049	0.325342	-0.913583	0.641345	-0.269513	1.43837	0.63758	0.203749	0.047174	-0.865662	-0.820222	-0.815705	-0.584662	-0.579125	0.42275	-0.0643279	-0.935498	-0.151603	61
66	Understanding and Engineering Microbial Consortia/Non-Axenic Microbial Systems	0.768882	-0.469694	1.01897	1.68421	-1.58898	0.678647	-0.295386	-0.00594384	-0.0800629	-1.5364	-1.0903	-0.0409329	-0.533894	-0.0599204	-0.0842181	-0.552036	-1.34026	-0.169177	-0.637967	1.1528	1.18469	0.675245	1.44627	-0.129086	-1.02102	-1.40343	0.435408	-0.562032	-1.36632	-0.868298	1.52054	-1.08297	0.165069	-1.46593	-0.16628	64
67	Weaponized Bio Narratives	1.27648	-0.13909	0.732249	0.918967	-0.494423	-0.201473	-1.33792	0.456561	0.832743	1.62303	-0.269215	-1.53334	-1.0354	0.931648	1.77843	0.76578	1.39463	0.545519	0.279226	0.290161	-0.847949	-0.309246	0.538069	-0.129086	0.215526	-1.40343	1.11902	0.251269	-0.430275	-0.111936	1.36744	-0.581062	1.21456	-0.0786546	0.224377	17
68	The Regulation of Cognitive Enhancement	0.841396	0.927375	0.804685	1.54604	1.35319	-0.201473	0.573396	0.0505845	0.942279	-0.101945	0.783463	-1.48945	-0.972716	-0.312673	0.907256	0.508074	-0.318709	-1.88444	-0.719951	-0.930497	-0.844676	1.50522	1.54104	-0.16742	1.15765	-1.40343	-0.345234	-1.68193	-0.815705	1.24637	1.52054	-1.08297	-0.924567	0.696585	0.079628	33
69	Enforcement of Standardization in Biological Engineering	0.309626	-0.144422	-1.23861	-0.0375882	-0.0916262	-0.641533	-2.03295	0.420588	-1.46753	-1.44561	-0.585018	0.573589	0.672867	0.79555	0.0485316	1.18748	-0.329463	-0.00942121	-1.18111	-0.902307	1.43018	0.953375	0.0958153	-0.205753	-0.137772	1.01424	1.38365	-0.142472	-0.540398	1.21485	1.63927	-0.079156	-0.351074	-0.119457	0.00165727	42
70	Improved Regulation of Genetically Modified and Genetically Engineered Crops	-1.64825	-0.240404	0.898248	-0.795747	-0.538205	1.11871	0.573396	0.0557235	-0.84682	-1.1914	-0.321849	-2.08202	0.586669	-0.565426	1.57515	-0.106907	1.40539	-0.640035	-1.64227	1.54183	1.43345	1.24916	0.601248	-0.244086	-0.891475	1.01424	1.59534	0.883837	-0.639508	1.49534	0.158258	0.42275	-1.03927	-0.160259	0.0886708	31
71	Governance and Oversight of Genome Editing	-1.45488	-0.251069	1.14875	-1.02603	1.37508	0.678647	-2.01557	-2.58569	1.16135	0.769622	0.544856	0.354117	0.719883	1.06386	1.52537	1.32219	-0.601877	0.200783	1.00683	1.01466	1.44327	-1.2231	1.55683	1.40425	0.598266	0.530708	-0.914176	-0.336115	-1.30025	-0.111936	-0.466643	2.43037	-2.473	1.10461	0.211587	18
72	Regulating Biohacking/DIY Biology	1.49402	-0.256401	1.10952	-0.076559	-0.581987	-0.641533	0.573396	-1.97416	-1.21194	0.224892	0.62907	-1.86255	0.931458	-2.22971	0.50071	0.783351	-0.684319	0.108293	0.299722	-0.893849	1.10614	-1.48799	1.53314	1.78758	0.144866	-1.40343	-0.808326	-1.68516	0.571843	-0.301026	1.63927	1.47173	-1.72746	-0.201061	-0.0917191	55
73	Further Development and Formalisation of a Bioengineering Code of Ethics	-1.84162	0.394142	-1.20239	0.274178	1.39697	-0.201473	-0.295386	-3.09959	-1.28497	-0.319837	-1.28329	0.661378	1.03333	-0.849287	0.0858675	0.203512	-0.687903	0.0242115	-1.15549	-0.392055	0.153642	-1.62043	-0.43331	-0.282419	0.250856	1.01424	-2.07852	-0.200564	-0.529386	-0.39242	0.0270288	2.43037	-1.38336	-0.241863	-0.347819	76
74	Increasing Need for the Effective Science Communication of Emerging Technologies Such as Gene Drives	0.986424	-0.480359	-1.36235	-0.859517	0.0397205	-0.201473	0.39964	-2.57541	-0.408673	1.5504	-1.74998	-0.765191	0.241881	-0.981496	1.86554	-0.15962	-0.333047	-0.0598703	-1.33483	-0.876935	0.837735	-1.61601	-0.243773	-0.320753	-0.14366	1.01424	-1.92416	0.541734	-0.474324	-0.423935	1.14248	0.924655	-1.67011	-0.0786546	-0.279403	75
75	Challenged Regulatory Definitions	0.280621	-0.320389	-1.36537	1.09256	0.127285	-0.201473	-2.03295	-2.02041	-0.0435507	-0.174576	0.383445	-1.42361	0.226209	1.30106	-0.308233	0.806779	-0.691487	0.343722	-0.258792	1.55029	0.752633	-1.62484	0.332737	-0.359086	-0.432187	0.530708	0.854396	1.27758	-0.749631	1.55837	0.664427	-0.079156	0.566514	-2.36357	-0.0529409	51
76	Regulating Data Storage, Protection and Use	1.0106	-0.29906	-1.36839	1.27679	0.0835028	-0.201473	-1.33792	0.949899	1.05182	0.0796312	0.850132	0.134645	0.218372	-0.386555	1.91947	0.461218	1.13656	0.848213	0.448318	-0.899487	-0.474807	-1.32023	1.56473	-0.397419	-0.726602	0.530708	0.589772	1.25176	-0.634002	-0.565753	0.870645	1.92847	0.0503706	-0.282665	0.245919	13
77	Data Management Support for Biomedical Research	-0.197972	-0.315057	-1.37141	-0.395411	-0.201082	-0.201473	-1.33792	0.379477	-0.153087	-0.283522	-1.1675	0.0907504	0.249717	0.262825	-0.00539795	0.584214	1.10071	0.175559	-1.20161	-0.874116	-1.28001	-1.54096	1.03561	-0.435753	-1.00924	1.01424	-1.2626	0.80638	-0.52388	-0.55945	0.761287	1.42656	0.09625	-0.282665	-0.194604	69
78	Information Hazards	1.29582	-0.304392	-1.35933	0.345034	1.30065	-0.201473	-1.33792	-0.242335	-1.17543	0.188577	1.13435	0.288275	0.500472	0.853878	-0.569584	1.24605	1.08996	0.764131	-0.310032	-0.61758	-1.3782	-1.41735	1.59632	-0.474086	-0.467517	-1.40343	-1.48312	0.851563	-1.29474	-0.540541	0.0895189	-1.08297	0.795911	-0.0786546	-0.0999464	56
79	Ensuring the Responsible Governance of Engineering Biology Scale-Up	-1.3582	-0.171084	-1.35632	-1.02603	1.24373	-0.201473	-1.33792	-0.925814	-1.3945	1.16909	-1.74296	0.946692	1.00982	1.00942	1.35943	-0.288473	-1.37611	0.00739514	-1.43731	-0.871297	-1.01815	-1.64692	1.29622	-0.512419	1.92313	0.288941	-1.21849	1.23885	0.0762899	1.74746	-0.810338	-1.08297	0.566514	-0.323467	-0.182861	67
80	What Future/s for Responsible Research and Innovation?	-0.681399	-0.363048	-1.3533	-0.473352	1.41886	-0.201473	-1.33792	1.00129	-1.54055	0.515415	-1.40611	0.72722	1.00198	1.00553	1.36358	-0.0893363	-0.698656	0.865029	-0.351024	-0.868478	-1.02143	-1.05534	0.538069	-0.550752	1.34608	1.01424	-0.821558	1.1743	0.626904	0.991093	-1.08842	1.42656	-0.179026	-2.28197	-0.0396169	47
81	Changing Economies of Bioscience	1.10728	0.260834	-1.35028	1.25199	0.236741	0.238587	0.573396	1.42268	0.431108	1.82277	1.29226	0.617483	-0.0950718	-0.332116	1.88629	-0.112764	-1.98546	1.03319	0.940221	1.64613	-1.41093	-1.01119	-0.346439	-0.589086	-2.08091	0.772475	-0.376107	1.16139	0.191919	-0.672905	-1.38525	0.42275	0.560779	-2.32277	0.111735	29
82	Demand-Driven Public Support for Critical Public Missions	-0.826427	2.52707	-1.32915	0.865825	-0.1573	-0.201473	0.573396	1.37129	-0.992869	-0.864567	-1.15346	0.419959	-0.455533	1.00164	1.61664	-0.733602	-0.616215	0.705274	-0.00259286	-0.865659	0.552969	-0.631523	-1.61792	-0.627419	1.74648	-1.40343	-1.06413	1.15494	-0.52388	-0.694965	1.54554	1.42656	1.07692	-2.20036	-0.0111168	44
83	Divergent Narratives and Reactive Responses	0.333798	0.127526	-1.34726	-0.257242	1.55021	-0.641533	-2.03295	1.35074	0.613669	-0.791936	-1.83069	0.0907504	-0.627927	-0.293231	1.24743	-0.575464	-0.619799	0.419396	-0.427884	-0.327216	0.670803	0.242599	0.553864	-0.665752	-2.90527	-0.194593	-1.3067	1.08393	-1.07449	-0.66345	1.36744	0.42275	-0.523122	-2.40437	-0.277529	73

## Sheet: Scores 2 Raw
Issue Group	New Nr	ISSUE	RANK	Heard of (%)	Participant 1	Participant 2	Participant 3	Participant 4	Participant 5	Participant 6	Participant 7	Participant 8	Participant 9	Participant 10	Participant 11	Participant 12	Participant 13	Participant 14	Participant 15	Participant 16	Participant 17	Participant 18	Participant 19	Participant 20	Participant 21	Participant 22	Participant 23	Participant 24
Shifts in Access to and Benefit Sharing from Biotechnologies	1	A Commons Approach Adopted to Certain Genetic Resources in International Governance (MERGED)	8	47.06	567	400	320	650	200	100	700	350	50	300	200	40	200	10	150	750	200	830	810	560	550	350	400	100
AI and Bioengineering	2	Dual-Use Concerns from Applying Machine Learning to Biotechnology	24	82.35	388	300	450	610	650	300	74	10	51	500	300	20	150	15	50	350	50	211	900	210	200	200	290	600
Bioindustry	3	Full Genome Synthesis and New Industrial Organisms	3	82.35	452	450	580	851	700	250	35	15	87	400	250	700	175	100	200	400	700	342	710	310	630	250	560	700
Bioindustry	4	Outsourcing in Biotechnology	16	76.47	838	700	880	700	850	210	76	700	564	700	700	650	700	900	450	850	250	863	820	880	549	600	640	110
Bioindustry	5	Edible Vaccines for Intensive Agricultural Systems	5	50	912	650	630	920	450	180	85	895	108	800	400	600	550	980	600	825	1000	624	560	910	680	650	660	350
Bioweapons	6	Attacking the Central Nervous System	30	64.71	957	620	620	705	900	850	59	650	942	400	290	550	450	400	700	950	500	885	850	780	685	700	750	800
Bioweapons	7	Bioengineering and Environmental Bioweapons	6	79.41	222	380	490	800	840	450	86	9	24	500	280	40	225	200	40	200	30	226	200	320	590	210	300	120
Bioweapons	8	Bioengineering and Exotic Biological Weapon Systems	12	73.53	867	480	500	790	825	350	71	80	1	700	750	400	575	450	750	875	20	477	1	550	650	620	450	121
Bioweapons	9	Defensive Developments in the Emerging Biotechnological-Environmental-Engineering Complex	9	67.65	945	470	485	810	750	460	83	801	48	500	281	420	475	1000	350	350	25	628	2	790	580	450	599	122
Cognition	10	Biomimetic Strategies for Human-Machine Interfaces and New Sensory Capabilities (MERGED)	23	67.65	813	690	715	890	775	650	93	333	632	700	500	620	600	700	220	1000	400	239	620	660	700	680	710	690
Environment and Climate Change	11	Carbon Pricing as a Driver of the Bioeconomy	28	58.82	10	495	395	550	675	410	950	30	2	500	310	350	1	120	90	300	150	151	350	560	581	190	430	200
Environment and Climate Change	12	Carbon Sequestration Through Enhanced Photosynthesis, Synthetic Metabolic Engineering and Plant Root Engineering (MERGED)	2	50	775	695	715	730	500	680	62	300	438	600	460	730	625	230	800	775	750	432	3	540	701	400	760	400
Environment and Climate Change	13	Crops for the New Climate	11	85.29	381	510	575	799	810	380	61	999	346	700	550	480	650	240	310	800	800	513	830	440	561	630	560	201
Environment and Climate Change	14	Sustainably Meeting the Growing Demand for Biomass and Feedstock (MERGED)	19	73.53	555	582	586	570	350	170	81	875	432	600	50	340	635	520	670	700	35	614	890	890	530	500	610	205
Environment and Climate Change	15	Phytoremediation of Contaminated Soils	4	58.82	240	642	566	780	625	380	79	890	534	700	600	520	585	480	330	675	430	555	740	590	740	260	600	406
Environment and Climate Change	16	Using Bioengineering for Enhanced Recycling and the Circular Economy	20	82.35	177	442	476	798	725	800	80	390	35	800	55	320	350	660	75	725	140	326	120	110	545	420	100	409
Food and Agriculture	17	Live-Plant Dispensers of Chemical Signals	21	41.18	888	762	616	699	550	290	100	950	843	600	570	440	850	750	690	780	850	897	575	760	775	340	800	500
Food and Agriculture	18	Agricultural Gene Drives	22	85.29	789	883	712	600	780	950	43	750	437	700	45	460	535	300	820	500	100	308	430	840	615	180	620	300
Health and Biomedicine	19	Bioengineered Replacement Organs	34	79.41	698	884	512	801	690	320	40	860	622	600	650	660	425	650	415	525	450	279	895	510	765	360	670	501
Health and Biomedicine	20	DIY Pharma	37	82.35	700	724	522	615	525	160	57	401	589	800	350	280	610	350	732	380	440	670	885	720	475	490	320	650
Health and Biomedicine	21	The Rise of Cell Therapies and Personalised Medicine	14	82.35	768	823	812	888	910	205	51	670	768	900	450	720	545	330	835	900	460	421	742	676	616	230	710	123
Health and Biomedicine	22	Direct-To-Consumer Genetic Testing (DTC-GT)	25	85.29	132	583	723	715	590	310	47	5	472	600	40	140	5	550	333	821	23	402	825	727	495	50	100	150
Health and Biomedicine	23	(Mammalian) Microbiome Engineering	39	70.59	333	563	769	560	480	860	46	752	634	900	800	260	645	500	30	783	600	603	773	333	510	460	200	501
Health and Biomedicine	24	Using DNA Origami for Enhanced Drug Delivery	35	58.82	670	602	519	555	100	90	60	40	424	600	320	60	185	490	135	830	180	294	11	33	795	120	700	108
Health and Biomedicine	25	Discovering New Antibiotics Through Novel Soil Screening	7	52.94	320	524	799	840	790	260	90	1	465	400	220	580	800	530	70	450	40	525	7	44	675	590	710	406
Health and Biomedicine	26	Virus Resurrection	33	73.53	125	375	489	605	880	95	56	2	33	600	35	10	300	570	45	100	5	166	115	145	665	60	150	407
Health and Biomedicine	27	Genetically Engineered Phage Therapy to Disrupt Human and Animal Infections	1	67.65	666	636	788	700	685	370	96	600	24	800	670	570	505	1000	890	425	130	287	812	555	668	610	820	510
Human Genome Innovations	28	Function-Based Design in Protein Engineering	36	58.82	567	456	829	620	760	415	32	4	722	600	555	100	375	190	145	950	255	798	623	666	662	460	790	530
Human Genome Innovations	29	Protection vs Efficient Exploitation of Genomic Information	26	85.29	321	415	709	640	820	230	68	6	765	700	190	120	125	800	791	793	22	259	884	9	640	180	340	170
Human Genome Innovations	30	The Regulation of Human Germline Engineering	15	82.35	100	126	719	710	830	900	350	401	125	500	60	60	405	850	247	906	2	210	922	83	300	170	370	103
Human Genome Innovations	31	Human Genomics Overlapping with Other Emerging Technologies	38	67.65	777	537	727	658	710	500	800	11	99	700	65	710	695	960	777	786	24	391	950	554	555	510	820	705
International Governance	32	Changing Norms in Bioengineering due to Multipolarity	32	47.06	53	127	698	794	575	105	450	777	656	400	850	120	250	690	401	810	175	442	5	995	735	850	150	150
International Governance	33	Coordinating the International Governance of Biological Engineering and AI	41	58.82	987	437	678	655	510	600	850	99	233	600	260	70	710	670	237	915	1	723	6	332	545	0	200	108
Novel Foundational Technologies	34	Bio-Based Production of Materials	10	82.35	731	567	718	821	300	395	45	850	345	500	330	630	715	620	555	940	470	604	940	799	754	580	830	540
Policy and Governance	35	Weaponized Bio Narratives	17	61.76	1	687	418	698	640	695	99	701	2	100	30	200	2	20	20	630	4	415	8	432	435	345	260	102
Policy and Governance	36	The Regulation of Cognitive Enhancement	31	61.76	972	568	713	697	950	855	300	20	532	100	770	240	480	770	712	912	300	616	9	567	557	1	280	203
Policy and Governance	37	Enforcement of Standardization in Biological Engineering	40	76.47	250	238	663	797	610	50	34	11	59	100	680	130	3	25	39	814	205	307	10	112	583	440	180	111
Policy and Governance	38	Improved Regulation of Genetically Modified and Genetically Engineered Crops	29	88.24	98	459	613	656	800	200	81	888	258	100	120	220	705	35	785	733	725	518	4	98	450	80	670	112
Policy and Governance	39	Governance and Oversight of Genome Editing	18	94.12	222	229	673	852	1000	705	55	666	11	200	25	80	510	550	23	672	710	209	311	321	410	50	560	104
Policy and Governance	40	Regulating Data Storage, Protection and Use	13	82.35	972	569	833	808	815	899	70	7	853	700	780	460	590	890	696	711	26	420	111	888	623	511	780	203
Policy and Governance	41	Changing Economies of Bioscience	27	64.71	911	259	724	680	715	799	175	899	566	300	105	230	795	990	101	603	480	311	195	921	688	705	470	367
				Average	540.244	525.341	633.146	722.366	674.146	436.049	165.122	431.659	361.732	548.78	364.537	349.512	456.366	514.268	397.78	687.659	296.512	463.195	474.488	517.561	596.659	377.61	510.22	321.902
				STD	318.722	180.833	132.098	99.9829	195.95	267.756	233.816	367.1	289.5	214.274	255.781	233.582	238.878	308.238	296.821	223.416	283.491	208.403	369.321	286.02	122.577	222.306	229.268	211.353

## Sheet: Scores 2 Standardised
Issue Group	New Nr	ISSUE	RANK	Heard of (%)	Participant 1	Participant 2	Participant 3	Participant 4	Participant 5	Participant 6	Participant 7	Participant 8	Participant 9	Participant 10	Participant 11	Participant 12	Participant 13	Participant 14	Participant 15	Participant 16	Participant 17	Participant 18	Participant 19	Participant 20	Participant 21	Participant 22	Participant 23	Participant 24	Average	Rank
Shifts in Access to and Benefit Sharing from Biotechnologies	1	A Commons Approach Adopted to Certain Genetic Resources in International Governance (MERGED)	8	47.06	0.083948	-0.693135	-2.37056	-0.723783	-2.41974	-1.25506	2.2876	-0.222442	-1.07679	-1.16104	-0.643272	-1.32507	-1.07321	-1.63597	-0.834781	0.279037	-0.340441	1.76008	0.908457	0.148378	-0.380648	-0.124197	-0.480745	-1.04992	-0.514304	34
AI and Bioengineering	2	Dual-Use Concerns from Applying Machine Learning to Biotechnology	24	82.35	-0.477669	-1.24613	-1.38644	-1.12385	-0.123227	-0.508108	-0.389717	-1.14862	-1.07334	-0.227655	-0.252312	-1.41069	-1.28252	-1.61975	-1.17168	-1.51134	-0.869558	-1.21013	1.15215	-1.07531	-3.236	-0.798943	-0.960533	1.3158	-0.859816	40
Bioindustry	3	Full Genome Synthesis and New Industrial Organisms	3	82.35	-0.276868	-0.416636	-0.402325	1.28656	0.13194	-0.694845	-0.556514	-1.135	-0.948987	-0.694348	-0.447792	1.50049	-1.17786	-1.34399	-0.666329	-1.28754	1.42328	-0.581542	0.63769	-0.725687	0.272005	-0.574028	0.217128	1.78894	-0.194678	27
Bioindustry	4	Outsourcing in Biotechnology	16	76.47	0.934218	0.965857	1.86872	-0.223697	0.897444	-0.844235	-0.381163	0.730976	0.698681	0.705731	1.31153	1.28643	1.01991	1.25141	0.175929	0.726632	-0.164069	1.91842	0.935534	1.26718	-0.388806	1.00038	0.566064	-1.0026	0.635686	3
Bioindustry	5	Edible Vaccines for Intensive Agricultural Systems	5	50	1.16639	0.689358	-0.0238182	1.97668	-1.1439	-0.956277	-0.342671	1.26217	-0.876448	1.17242	0.138648	1.07237	0.391974	1.51095	0.681284	0.614733	2.48151	0.771606	0.231539	1.37207	0.679913	1.22529	0.653298	0.132942	0.620085	5
Bioweapons	6	Attacking the Central Nervous System	30	64.71	1.30758	0.523459	-0.0995196	-0.173688	1.15261	1.546	-0.45387	0.594773	2.00438	-0.694348	-0.291408	0.858317	-0.0266489	-0.370715	1.01819	1.17423	0.717792	2.02399	1.01676	0.917555	0.720703	1.45021	1.04585	2.26208	0.759345	1
Bioweapons	7	Bioengineering and Environmental Bioweapons	6	79.41	-0.998499	-0.803734	-1.08364	0.776475	0.84641	0.0521042	-0.338394	-1.15134	-1.1666	-0.227655	-0.330504	-1.32507	-0.968551	-1.01956	-1.20537	-2.18273	-0.940107	-1.13816	-0.743223	-0.690724	-0.0543214	-0.75396	-0.916916	-0.955286	-0.72164	37
Bioweapons	8	Bioengineering and Exotic Biological Weapon Systems	12	73.53	1.02521	-0.250737	-1.00794	0.676457	0.76986	-0.32137	-0.402547	-0.957936	-1.24605	0.705731	1.50701	0.216146	0.49663	-0.208502	1.18664	0.838531	-0.975381	0.0662413	-1.28205	0.113415	0.435168	1.09035	-0.26266	-0.950555	0.0525689	21
Bioweapons	9	Defensive Developments in the Emerging Biotechnological-Environmental-Engineering Complex	9	67.65	1.26993	-0.306037	-1.12149	0.876492	0.387108	0.0894517	-0.351225	1.00611	-1.0837	-0.227655	-0.326595	0.301768	0.0780068	1.57584	-0.160974	-1.51134	-0.957744	0.790799	-1.27934	0.952518	-0.135903	0.325633	0.387234	-0.945824	-0.0152894	24
Cognition	10	Biomimetic Strategies for Human-Machine Interfaces and New Sensory Capabilities (MERGED)	23	67.65	0.85578	0.910557	0.619643	1.67663	0.514692	0.799053	-0.308456	-0.268751	0.933569	0.705731	0.529608	1.158	0.601286	0.60256	-0.598948	1.39802	0.365047	-1.07578	0.393999	0.498004	0.843076	1.36024	0.871384	1.74163	0.630274	4
Environment and Climate Change	11	Carbon Pricing as a Driver of the Bioeconomy	28	58.82	-1.66365	-0.167787	-1.8028	-1.72395	0.00435652	-0.0972856	3.35682	-1.09414	-1.2426	-0.227655	-0.213216	0.00208836	-1.90627	-1.2791	-1.03692	-1.73514	-0.516814	-1.49804	-0.337072	0.148378	-0.127745	-0.843926	-0.349894	-0.576772	-0.622047	36
Environment and Climate Change	12	Carbon Sequestration Through Enhanced Photosynthesis, Synthetic Metabolic Engineering and Plant Root Engineering (MERGED)	2	50	0.736554	0.938207	0.619643	0.0763545	-0.888731	0.911096	-0.441039	-0.358645	0.263448	0.239038	0.373224	1.62892	0.705942	-0.922237	1.35509	0.390936	1.59965	-0.149687	-1.27663	0.0784527	0.851234	0.100718	1.08947	0.369513	0.345438	12
Environment and Climate Change	13	Crops for the New Climate	11	85.29	-0.499632	-0.0848379	-0.440176	0.766473	0.693309	-0.209328	-0.445316	1.54547	-0.0543409	0.705731	0.725088	0.558637	0.810597	-0.889795	-0.295735	0.502835	1.77602	0.238984	0.96261	-0.271173	-0.290908	1.13533	0.217128	-0.572041	0.274372	14
Environment and Climate Change	14	Sustainably Meeting the Growing Demand for Biomass and Feedstock (MERGED)	19	73.53	0.0462977	0.31332	-0.356904	-1.52392	-1.65423	-0.993624	-0.359778	1.20769	0.242723	0.239038	-1.22971	-0.0407231	0.747804	0.0185951	0.917117	0.0552398	-0.92247	0.723622	1.12507	1.30214	-0.543811	0.550549	0.435213	-0.553115	-0.0105781	23
Environment and Climate Change	15	Phytoremediation of Contaminated Soils	4	58.82	-0.942023	0.645119	-0.508307	0.57644	-0.250811	-0.209328	-0.368332	1.24855	0.595054	0.705731	0.920568	0.729883	0.538492	-0.111175	-0.228355	-0.056659	0.470871	0.440516	0.71892	0.253266	1.1694	-0.529045	0.391596	0.397901	0.274928	13
Environment and Climate Change	16	Using Bioengineering for Enhanced Recycling and the Circular Economy	20	82.35	-1.13969	-0.460876	-1.18962	0.756471	0.259524	1.35927	-0.364055	-0.11348	-1.12861	1.17242	-1.21016	-0.126346	-0.445272	0.47279	-1.08746	0.167138	-0.552088	-0.658317	-0.959837	-1.42494	-0.421438	0.190684	-1.78926	0.412096	-0.345044	29
Food and Agriculture	17	Live-Plant Dispensers of Chemical Signals	21	41.18	1.09109	1.30872	-0.1298	-0.233699	-0.633563	-0.545455	-0.278518	1.41199	1.66241	0.239038	0.80328	0.387391	1.64784	0.764773	0.984497	0.413316	1.9524	2.08157	0.272154	0.84763	1.45494	-0.16918	1.26394	0.842655	0.726642	2
Food and Agriculture	18	Agricultural Gene Drives	22	85.29	0.780479	1.97784	0.596933	-1.22387	0.540209	1.91948	-0.522299	0.867179	0.259994	0.705731	-1.24926	0.473014	0.329181	-0.69514	1.42247	-0.83995	-0.693186	-0.744688	-0.120458	1.12733	0.149633	-0.888909	0.47883	-0.10363	0.189455	17
Health and Biomedicine	19	Bioengineered Replacement Organs	34	79.41	0.494964	1.98337	-0.917094	0.786476	0.0809068	-0.433413	-0.53513	1.16682	0.899027	0.239038	1.11605	1.32924	-0.131305	0.440348	0.0580131	-0.728051	0.54142	-0.883841	1.13861	-0.0264351	1.37336	-0.079214	0.696915	0.847387	0.394061	11
Health and Biomedicine	20	DIY Pharma	37	82.35	0.501239	1.09858	-0.841393	-1.07384	-0.761147	-1.03097	-0.462423	-0.0835154	0.785037	1.17242	-0.0568322	-0.297592	0.643148	-0.532927	1.126	-1.37706	0.506145	0.992332	1.11153	0.707779	-0.992509	0.505566	-0.829681	1.55237	0.098427	20
Health and Biomedicine	21	The Rise of Cell Therapies and Personalised Medicine	14	82.35	0.714591	1.64604	1.35395	1.65663	1.20364	-0.862908	-0.488084	0.649254	1.40334	1.63912	0.334128	1.58611	0.371043	-0.597812	1.47301	0.950429	0.576694	-0.202469	0.724335	0.553944	0.157791	-0.663994	0.871384	-0.941092	0.587878	6
Health and Biomedicine	22	Direct-To-Consumer Genetic Testing (DTC-GT)	25	85.29	-1.28088	0.31885	0.680205	-0.0736712	-0.429429	-0.47076	-0.505192	-1.16224	0.380892	0.239038	-1.26881	-0.896952	-1.88952	0.115923	-0.218248	0.59683	-0.964799	-0.293639	0.949072	0.732253	-0.829346	-1.47369	-1.78926	-0.813344	-0.431113	33
Health and Biomedicine	23	(Mammalian) Microbiome Engineering	39	70.59	-0.650233	0.208251	1.02843	-1.62394	-0.990798	1.58335	-0.509469	0.872627	0.940477	1.63912	1.70249	-0.383215	0.789666	-0.0462899	-1.23906	0.426743	1.07054	0.670839	0.808273	-0.645273	-0.706974	0.370616	-1.35309	0.847387	0.200436	16
Health and Biomedicine	24	Using DNA Origami for Enhanced Drug Delivery	35	58.82	0.407113	0.42392	-0.864103	-1.67395	-2.93007	-1.2924	-0.449593	-1.0669	0.215089	0.239038	-0.17412	-1.23944	-1.136	-0.0787324	-0.885316	0.637113	-0.41099	-0.811866	-1.25497	-1.69415	1.6181	-1.15881	0.827767	-1.01206	-0.573556	35
Health and Biomedicine	25	Discovering New Antibiotics Through Novel Soil Screening	7	52.94	-0.691021	-0.00741826	1.25553	1.17654	0.591242	-0.657497	-0.321287	-1.17314	0.356712	-0.694348	-0.56508	0.986752	1.43853	0.0510376	-1.1043	-1.06375	-0.904832	0.296564	-1.2658	-1.65569	0.639122	0.955396	0.871384	0.397901	-0.0453102	25
Health and Biomedicine	26	Virus Resurrection	33	73.53	-1.30284	-0.831384	-1.09121	-1.17386	1.05054	-1.27373	-0.4667	-1.17041	-1.13552	0.239038	-1.28836	-1.4535	-0.654584	0.180808	-1.18853	-2.63033	-1.02829	-1.42606	-0.973375	-1.30257	0.55754	-1.42871	-1.57117	0.402633	-0.873357	41
Health and Biomedicine	27	Genetically Engineered Phage Therapy to Disrupt Human and Animal Infections	1	67.65	0.394563	0.611939	1.17226	-0.223697	0.0553901	-0.246675	-0.295625	0.458571	-1.1666	1.17242	1.19424	0.94394	0.203594	1.57584	1.6583	-1.17565	-0.587362	-0.845454	0.913872	0.130897	0.582015	1.04536	1.35117	0.88997	0.408887	10
Human Genome Innovations	28	Function-Based Design in Protein Engineering	36	58.82	0.083948	-0.383456	1.48264	-1.02383	0.438142	-0.0786118	-0.569345	-1.16496	1.24445	0.239038	0.744636	-1.0682	-0.340616	-1.05201	-0.851626	1.17423	-0.146432	1.60653	0.402122	0.518981	0.533066	0.370616	1.22032	0.984598	0.181842	18
Human Genome Innovations	29	Protection vs Efficient Exploitation of Genomic Information	26	85.29	-0.687884	-0.610185	0.574223	-0.8238	0.744343	-0.76954	-0.415378	-1.15952	1.39298	0.705731	-0.682368	-0.982575	-1.38717	0.926985	1.32477	0.471503	-0.968326	-0.979809	1.10882	-1.77806	0.353586	-0.888909	-0.742447	-0.718715	-0.249656	28
Human Genome Innovations	30	The Regulation of Human Germline Engineering	15	82.35	-1.38128	-2.20835	0.649924	-0.12368	0.795376	1.73274	0.790699	-0.0835154	-0.817726	-0.227655	-1.19062	-1.23944	-0.215029	1.0892	-0.507985	0.977285	-1.03888	-1.21493	1.21172	-1.51934	-2.42019	-0.933892	-0.611596	-1.03572	-0.396787	32
Human Genome Innovations	31	Human Genomics Overlapping with Other Emerging Technologies	38	67.65	0.742829	0.0644714	0.710485	-0.643769	0.182974	0.238842	2.71529	-1.1459	-0.907536	0.705731	-1.17107	1.5433	0.998978	1.44607	1.2776	0.440171	-0.961271	-0.346421	1.28753	0.1274	-0.339857	0.595532	1.35117	1.8126	0.446881	9
International Governance	32	Changing Norms in Bioengineering due to Multipolarity	32	47.06	-1.52874	-2.20282	0.490951	0.716464	-0.505979	-1.23638	1.21839	0.940728	1.01647	-0.694348	1.89797	-0.982575	-0.863895	0.570118	0.0108466	0.547594	-0.428627	-0.101703	-1.27122	1.66925	1.12861	2.12496	-1.57117	-0.813344	0.00548086	22
International Governance	33	Coordinating the International Governance of Biological Engineering and AI	41	58.82	1.40171	-0.488526	0.339548	-0.673774	-0.837697	0.612316	2.92913	-0.906179	-0.444669	0.239038	-0.408696	-1.19663	1.06177	0.505233	-0.541675	1.01757	-1.0424	1.24665	-1.26851	-0.648769	-0.421438	-1.6986	-1.35309	-1.01206	-0.149573	26
Novel Foundational Technologies	34	Bio-Based Production of Materials	10	82.35	0.598502	0.230371	0.642354	0.98651	-1.9094	-0.153307	-0.513746	1.13958	-0.0577952	-0.227655	-0.135024	1.20081	1.0827	0.34302	0.529678	1.12947	0.611969	0.675638	1.26045	0.983984	1.28362	0.910413	1.39479	1.03191	0.543285	7
Policy and Governance	35	Weaponized Bio Narratives	17	61.76	-1.69189	0.893967	-1.62869	-0.2437	-0.174261	0.967117	-0.282795	0.7337	-1.2426	-2.09443	-1.3079	-0.640083	-1.90208	-1.60353	-1.27276	-0.258077	-1.03182	-0.231259	-1.2631	-0.299143	-1.31884	-0.146689	-1.09138	-1.04045	-0.757112	39
Policy and Governance	36	The Regulation of Cognitive Enhancement	31	61.76	1.35465	0.235901	0.604503	-0.253702	1.40778	1.56468	0.576856	-1.12138	0.588146	-2.09443	1.5852	-0.468838	0.098938	0.829658	1.05862	1.00414	0.012303	0.733219	-1.26039	0.172852	-0.323541	-1.69411	-1.00415	-0.562578	0.126847	19
Policy and Governance	37	Enforcement of Standardization in Biological Engineering	40	76.47	-0.910648	-1.58899	0.225996	0.746469	-0.327362	-1.44179	-0.560791	-1.1459	-1.04571	-2.09443	1.23334	-0.939763	-1.89789	-1.58731	-1.20874	0.565498	-0.322804	-0.749486	-1.25768	-1.41795	-0.111428	0.28065	-1.44032	-0.997869	-0.749788	38
Policy and Governance	38	Improved Regulation of Genetically Modified and Genetically Engineered Crops	29	88.24	-1.38755	-0.366867	-0.152511	-0.663772	0.642276	-0.881582	-0.359778	1.2431	-0.358313	-2.09443	-0.95604	-0.55446	1.04084	-1.55487	1.30456	0.202946	1.51147	0.262976	-1.27393	-1.46689	-1.19646	-1.33874	0.696915	-0.993138	-0.362261	30
Policy and Governance	39	Governance and Oversight of Genome Editing	18	94.12	-0.998499	-1.63876	0.301698	1.29656	1.66295	1.00446	-0.470977	0.638358	-1.21151	-1.62773	-1.32745	-1.15382	0.224525	0.115923	-1.26265	-0.0700868	1.45856	-1.21973	-0.442671	-0.687228	-1.52279	-1.47369	0.217128	-1.03099	-0.384101	31
Policy and Governance	40	Regulating Data Storage, Protection and Use	13	82.35	1.35465	0.241431	1.51292	0.856488	0.718826	1.729	-0.406824	-1.15679	1.69695	0.705731	1.6243	0.473014	0.559423	1.21897	1.00471	0.104475	-0.954217	-0.207267	-0.984206	1.29515	0.214898	0.60003	1.1767	-0.562578	0.533991	8
Policy and Governance	41	Changing Economies of Bioscience	27	64.71	1.16326	-1.47286	0.687775	-0.423731	0.208491	1.35553	0.0422471	1.27306	0.70559	-1.16104	-1.01468	-0.511649	1.4176	1.54339	-0.999864	-0.378927	0.647243	-0.730293	-0.756761	1.41053	0.745178	1.4727	-0.175426	0.213376	0.219197	15

## Sheet: 2017 Scan- Standardised Final
Issue	Standardised Z-Score	Rank
Microbiome-Based Therapies	0.66517	1
Regenerative Medicine: 3D Printing Body Parts and Tissue Engineering	0.586712	2
Shifting Ownership Models in Biotechnology	0.537954	3
Rise of Automated Tools for Biological Design, Test and Optimisation	0.493136	4
Reassigning Codons as Genetic Firewalls	0.469947	5
Manufacturing Illegals Drugs Using Engineered Organisms	0.414431	6
Effects of the Nagoya Protocol on Biological Engineering	0.404727	7
Platform Technologies to Address Emerging Disease Pandemics	0.377166	8
New Makers Disrupt Pharmaceutical Makers	0.368478	9
Human Genome Editing	0.362838	10
Accelerating Defense Agency Research in Biological Engineering	0.320587	11
Biology as Information Science: Impacts on Global Governance	0.294301	12
Intersection of Information Security and Bio-Automation	0.201175	13
Challenges to Taxonomy-Based Description and Management of Biological Risk	0.1237	14
Artificial Photosynthesis and Carbon Capture for Producing Biofuels	0.0348251	15
Producing Vaccines and Human Therapeutics in Plants	0.00125749	16
Securing the Critical Infrastructure Needed to Deliver the Bioeconomy	0.000978354	17
Corporate Espionage and Biocrime	-0.0050403	18
Enhanced Photosynthesis for Agricultural Productivity	-0.089676	19
New Approaches to Synthetic Gene Drives	-0.225342	20
