# Supplementary material for: Bioengineering horizon scan 2020
Source: eLife. 2020 May 29;9:e54489. doi: 10.7554/eLife.54489 (PMC7259952; doi:10.7554/eLife.54489)
Supplement: Supplementary file 2. — Some of the top 20 issues had their titles changed after the workshop. In these cases, we have listed the final title in brackets next to the original title. [file elife-54489-supp2.xlsx]

## Sheet: Sheet1
Issue	Rank After First Round of Scoring	Rank After Second Round of Scoring	Heard of (%)
A Commons Approach Adopted to Certain Genetic Resources in International Governance	8	34	47.06
Dual-Use Concerns from Applying Machine Learning to Biotechnology	24	40	82.35
Full Genome Synthesis and New Industrial Organisms	3	27	82.35
Outsourcing in Biotechnology (Access to Biotechnology Through Outsourcing)	16	3	76.47
Edible Vaccines for Intensive Agricultural Systems (Production of Edible Vaccines in Plants)	5	5	50
Attacking the Central Nervous System (Malicious Use of Advanced Neurochemistry)	30	1	64.71
Bioengineering and Environmental Bioweapons	6	37	79.41
Bioengineering and Exotic Biological Weapon Systems	12	21	73.53
Defensive Developments in the Emerging Biotechnological-Environmental-Engineering Complex	9	24	67.65
Biomimetic Strategies for Human-Machine Interfaces and New Sensory Capabilities (Biomimetically Microfabricated Neuronal Probes Expanding New Sensory Capabilities)	23	4	67.65
Carbon Pricing as a Driver of the Bioeconomy	28	36	58.82
Carbon Sequestration Through Enhanced Photosynthesis, Synthetic Metabolic Engineering and Plant Root Engineering (Enhancing Carbon Sequestration)	2	12	50
Crops for the New Climate (Crops for Changing Climates)	11	14	85.29
Sustainably Meeting the Growing Demand for Biomass and Feedstock	19	23	73.53
Phytoremediation of Contaminated Soils	4	13	58.82
Using Bioengineering for Enhanced Recycling and the Circular Economy	20	29	82.35
Live-Plant Dispensers of Chemical Signals	21	2	41.18
Agricultural Gene Drives	22	17	85.29
Bioengineered Replacement Organs (Porcine Bioengineered Replacement Organs)	34	11	79.41
DIY Pharma (Distributed Pharmaceutical Development and Manufacturing)	37	20	82.35
The Rise of Cell Therapies and Personalised Medicine (The Rise of Personalised Medicines Such As Cell Therapies)	14	6	82.35
Direct-To-Consumer Genetic Testing (DTC-GT)	25	33	85.29
(Mammalian) Microbiome Engineering (Microbiome Engineering in Agriculture)	39	16	70.59
Using DNA Origami for Enhanced Drug Delivery	35	35	58.82
Discovering New Antibiotics Through Novel Soil Screening	7	25	52.94
Virus Resurrection	33	41	73.53
Genetically Engineered Phage Therapy to Disrupt Human and Animal Infections (Genetically Engineered Phage Therapy)	1	10	67.65
Function-Based Design in Protein Engineering	36	18	58.82
Protection vs Efficient Exploitation of Genomic Information	26	28	85.29
The Regulation of Human Germline Engineering	15	32	82.35
Human Genomics Overlapping with Other Emerging Technologies	38	9	67.65
Changing Norms in Bioengineering due to Multipolarity	32	22	47.06
Coordinating the International Governance of Biological Engineering and AI	41	26	58.82
Bio-Based Production of Materials	10	7	82.35
Weaponized Bio Narratives	17	39	61.76
The Regulation of Cognitive Enhancement (The Governance of Cognitive Enhancement)	31	19	61.76
Enforcement of Standardization in Biological Engineering	40	38	76.47
Improved Regulation of Genetically Modified and Genetically Engineered Crops	29	30	88.24
Governance and Oversight of Genome Editing	18	31	94.12
Regulating Data Storage, Protection and Use (State and International Regulation of Deoxyribonucleic Acid (DNA) Database Use)	13	8	82.35
Changing Economies of Bioscience (Philanthropy Shapes Bioscience Research Agendas	27	15	64.71
